# Supplementary material for: Possible atmospheric source of NH2SO3H: the hydrolysis of HNSO2 in the presence of neutral, basic, and acidic catalysts
Source: Royal Society of Chemistry journal article supplement (doi:10.1039/d1cp04437k), 2022-01-01
Supplement: d1cp04437k2.pdf [file d1cp04437k2.pdf]

## Supporting information

-for-

### A Possible Atmospheric Source of $\text{NH}_2\text{SO}_3\text{H}$ : The Hydrolysis of

### $\text{HNSO}_2$ in the Presence of Neutral, Basic and Acidic Catalysts

Tianlei Zhang <sup>a,\*</sup>, Yongqi Zhang <sup>a,#</sup>, Shiyu Tian <sup>a,#</sup>, Mi Zhou <sup>a,#</sup>, Dong Liu <sup>a,#</sup>, Ling Lin <sup>a,#</sup>, Qiang Zhang <sup>a</sup>, Rui Wang <sup>a,\*</sup>, Balaganesh Muthiah <sup>b,\*</sup>

<sup>a</sup> Institute of Theoretical and Computational Chemistry, Shaanxi Key Laboratory of Catalysis, School of Chemical & Environment Science, Shaanxi University of Technology, Hanzhong, Shaanxi 723001, P. R. China

<sup>b</sup> Department of Chemistry, National Taiwan University, Taipei 106, Taiwan

| S. NO  | Caption                                                                                                                                                                                                                                                                                                                                                                                                                                                                                                                                                                                                                                                                                  |
|--------|------------------------------------------------------------------------------------------------------------------------------------------------------------------------------------------------------------------------------------------------------------------------------------------------------------------------------------------------------------------------------------------------------------------------------------------------------------------------------------------------------------------------------------------------------------------------------------------------------------------------------------------------------------------------------------------|
| S1     | <b>Fig. S1</b> The optimized geometries and electric energies (in Hartree-Fock) for the complexes of $\text{HNSO}_2 \cdots (\text{H}_2\text{O})_2$ , $\text{HNSO}_2 \cdots (\text{H}_2\text{O})_3$ and $\text{HNSO}_2 \cdots (\text{H}_2\text{O})_4$ at the M06-2X/6-311+G(2df,2pd) level of theory                                                                                                                                                                                                                                                                                                                                                                                      |
| S2     | <b>Fig. S2</b> The optimized geometries and electric energies (in Hartree-Fock) for the complexes of $\text{HNSO}_2 \cdots \text{H}_2\text{O} \cdots \text{NH}_3$ and $\text{HNSO}_2 \cdots \text{H}_2\text{O} \cdots \text{CH}_3\text{NH}_2$ at the M06-2X/6-311+G(2df,2pd) level of theory                                                                                                                                                                                                                                                                                                                                                                                             |
| S3     | <b>Fig. S3</b> The optimized geometries and electric energies (in Hartree-Fock) for the complexes of $\text{HNSO}_2 \cdots \text{H}_2\text{O} \cdots \text{HCOOH}$ at the M06-2X/6-311+G(2df,2pd) level of theory                                                                                                                                                                                                                                                                                                                                                                                                                                                                        |
| S4     | <b>Fig. S4</b> The optimized geometries and electric energies (in Hartree-Fock) for the complexes of $\text{HNSO}_2 \cdots \text{H}_2\text{O} \cdots \text{H}_2\text{SO}_4$ at the M06-2X/6-311+G(2df,2pd) level of theory                                                                                                                                                                                                                                                                                                                                                                                                                                                               |
| S5     | <b>Fig. S5</b> The optimized geometries and electric energies (in Hartree-Fock) for the complexes of $\text{HNSO}_2 \cdots \text{H}_2\text{O} \cdots \text{H}_2\text{SO}_4 \cdots \text{H}_2\text{O}$ at the M06-2X/6-311+G(2df,2pd) level of theory                                                                                                                                                                                                                                                                                                                                                                                                                                     |
| S6     | <b>Fig. S6</b> The optimized geometries and electric energies (in Hartree-Fock) for the complexes of $\text{HNSO}_2 \cdots \text{H}_2\text{O} \cdots (\text{H}_2\text{SO}_4)_2$ at the M06-2X/6-311+G(2df,2pd) level of theory                                                                                                                                                                                                                                                                                                                                                                                                                                                           |
| S7     | <b>Fig. S7</b> Hindrance potentials for $\text{HNSO}_2$ , IM ( $\text{HNSO}_2 \cdots \text{H}_2\text{O}$ ), TS and IMF ( $\text{NH}_2\text{SO}_3\text{H}$ ) calculated at the M06-2X/6-311+G(2df,2pd) level of theory                                                                                                                                                                                                                                                                                                                                                                                                                                                                    |
| S8-S10 | <b>Table S1</b> Zero point energy (ZPE/(kcal·mol <sup>-1</sup> )), entropies (S/(cal·mol <sup>-1</sup> ·K <sup>-1</sup> )), relative energies ( $\Delta E$ and $\Delta(E + \text{ZPE})$ /(kcal·mol <sup>-1</sup> )), enthalpies ( $\Delta H(298)$ /(kcal·mol <sup>-1</sup> )), and free energies ( $\Delta G(298)$ /(kcal·mol <sup>-1</sup> )) for the hydrolysis reaction of $\text{HNSO}_2$ without and with catalyst $X$ ( $X = \text{H}_2\text{O}$ , $(\text{H}_2\text{O})_2$ , $(\text{H}_2\text{O})_3$ , $\text{NH}_3$ , $\text{CH}_3\text{NH}_2$ , $\text{HCOOH}$ , $\text{H}_2\text{SO}_4$ , $\text{H}_2\text{SO}_4 \cdots \text{H}_2\text{O}$ and $(\text{H}_2\text{SO}_4)_2$ ) |
| S11    | <b>Table S2</b> Equilibrium constants (cm <sup>3</sup> ·molecule <sup>-1</sup> ) for $\text{HNSO}_2 \cdots \text{H}_2\text{O}$ , $(\text{H}_2\text{O})_2$ , $\text{HNSO}_2 \cdots (\text{H}_2\text{O})_2$ , $(\text{H}_2\text{O})_3$ , $(\text{H}_2\text{O})_4$ , $\text{NH}_3 \cdots \text{H}_2\text{O}$ , $\text{CH}_3\text{NH}_2 \cdots \text{H}_2\text{O}$ , $\text{HCOOH} \cdots \text{H}_2\text{O}$ , $t$ -                                                                                                                                                                                                                                                                        |

\* Corresponding authors. Tel: +86-0916-2641083, Fax: +86-0916-2641083.

e-mail: ztianlei88@163.com (T. L. Zhang); wangrui830413@163.com (R. Wang); bala.msc09@gmail.com (M. Balaganesh)

# Yongqi Zhang, Shiyu Tian, Mi Zhou, Dong Liu and Ling Lin are contributed equally to this work.

|         |                                                                                                                                                                                                                                                                                                                                                                                                                                                                                                                                                                           |
|---------|---------------------------------------------------------------------------------------------------------------------------------------------------------------------------------------------------------------------------------------------------------------------------------------------------------------------------------------------------------------------------------------------------------------------------------------------------------------------------------------------------------------------------------------------------------------------------|
|         | H <sub>2</sub> SO <sub>4</sub> ···H <sub>2</sub> O, <i>c</i> -H <sub>2</sub> SO <sub>4</sub> ···H <sub>2</sub> O, <i>c</i> -H <sub>2</sub> SO <sub>4</sub> ···(H <sub>2</sub> O) <sub>2</sub> , (H <sub>2</sub> SO <sub>4</sub> ) <sub>2</sub> and (H <sub>2</sub> SO <sub>4</sub> ) <sub>2</sub> ···H <sub>2</sub> O within the temperature range of 280-320 K                                                                                                                                                                                                           |
| S12-S13 | <b>Table S3</b> Concentrations (molecules·cm <sup>-3</sup> ) of (H <sub>2</sub> O) <sub>2</sub> , (H <sub>2</sub> O) <sub>3</sub> , NH <sub>3</sub> ···H <sub>2</sub> O, CH <sub>3</sub> NH <sub>2</sub> ···H <sub>2</sub> O, HCOOH···H <sub>2</sub> O, <i>t</i> -H <sub>2</sub> SO <sub>4</sub> ···H <sub>2</sub> O, <i>c</i> -H <sub>2</sub> SO <sub>4</sub> ···H <sub>2</sub> O, <i>c</i> -H <sub>2</sub> SO <sub>4</sub> ···(H <sub>2</sub> O) <sub>2</sub> and (H <sub>2</sub> SO <sub>4</sub> ) <sub>2</sub> within the temperature range of 280-320 K <sup>a</sup> |
| S14     | <b>Table S4</b> Rate coefficients (cm <sup>3</sup> ·molecules <sup>-1</sup> ·s <sup>-1</sup> ) for the HNSO <sub>2</sub> + H <sub>2</sub> O reaction without and with <i>X</i> calculated by canonical variational transition (CVT) state theory with small curvature tunneling (SCT) correction within the temperature range of 280-320 K                                                                                                                                                                                                                                |
| S15-S17 | <b>Table S5</b> Rate coefficients (cm <sup>3</sup> ·molecules <sup>-1</sup> ·s <sup>-1</sup> ) for the hydrolysis reaction of HNSO <sub>2</sub> without and with <i>X</i> and the available calculated rate ratio ( <i>v<sub>s</sub></i> / <i>v<sub>o</sub></i> ) between stepwise route and the corresponding one-step process calculated by master equation within the temperature range of 280-320 K                                                                                                                                                                   |
| S18     | <b>Table S6</b> Pseudo-first-order rate constants ( <i>k'</i> ) in s <sup>-1</sup> for the favorable routes in the hydrolysis reaction of HNSO <sub>2</sub> with catalyst <i>X</i> within the temperature range of 280-320 K                                                                                                                                                                                                                                                                                                                                              |
| S19     | <b>Table S7</b> Equilibrium constants (cm <sup>3</sup> ·molecule <sup>-1</sup> ), concentrations (molecules·cm <sup>-3</sup> ) of catalysts, and rate coefficient (cm <sup>3</sup> ·molecules <sup>-1</sup> ·s <sup>-1</sup> ) involved in the hydrolysis reaction of HNSO <sub>2</sub> with catalysts of (H <sub>2</sub> O) <sub>2</sub> , (H <sub>2</sub> O) <sub>3</sub> , NH <sub>3</sub> , HCOOH and H <sub>2</sub> SO <sub>4</sub> ···H <sub>2</sub> O at different altitudes in troposphere                                                                        |
| S20-S28 | <b>Table S8</b> Coordinates stationary points for the hydrolysis reaction of HNSO <sub>2</sub> without and with catalyst <i>X</i> at the M06-2X/6-311+G(2 <i>df</i> ,2 <i>pd</i> ) level of theory                                                                                                                                                                                                                                                                                                                                                                        |

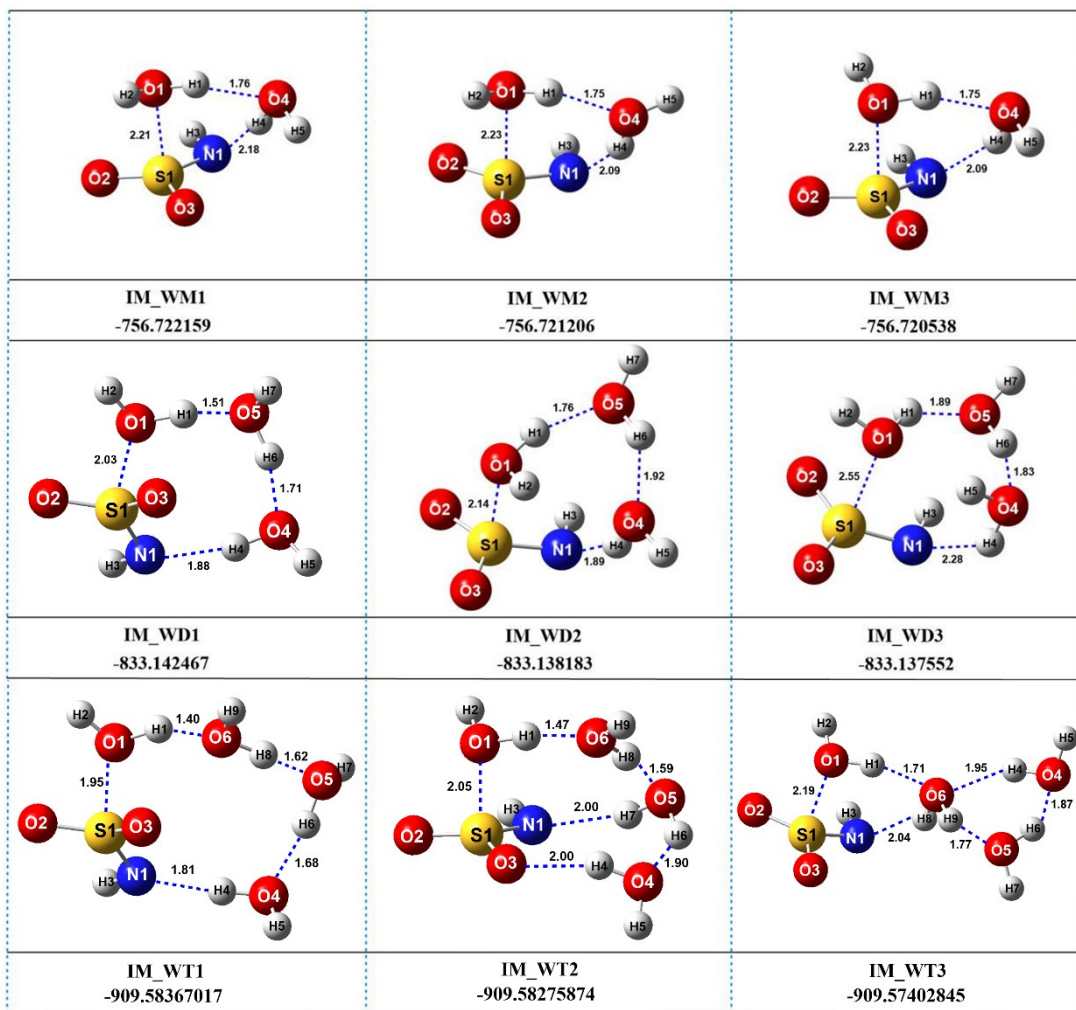

**Fig. S1** The optimized geometries and electric energies (in Hartree-Fock) for the complexes of  $\text{HNSO}_2 \cdots (\text{H}_2\text{O})_2$ ,  $\text{HNSO}_2 \cdots (\text{H}_2\text{O})_3$  and  $\text{HNSO}_2 \cdots (\text{H}_2\text{O})_4$  at the M06-2X/6-311+G(2df,2pd) level of theory

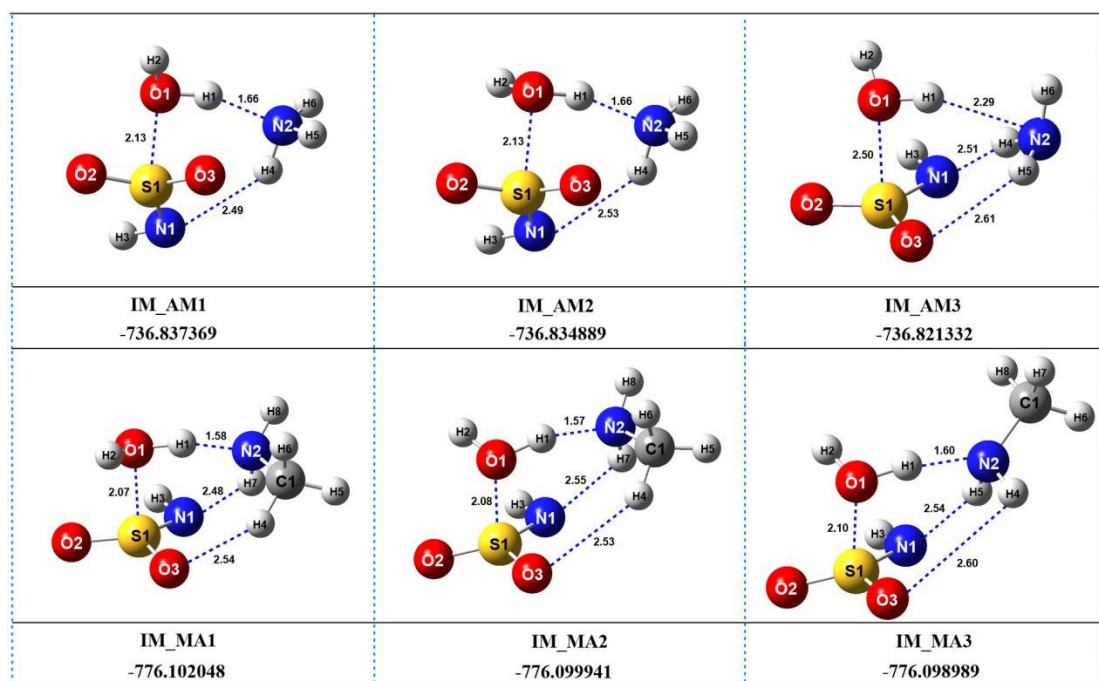

**Fig. S2** The optimized geometries and electric energies (in Hartree-Fock) for the complexes of  $\text{HNSO}_2 \cdots \text{H}_2\text{O} \cdots \text{NH}_3$  and  $\text{HNSO}_2 \cdots \text{H}_2\text{O} \cdots \text{CH}_3\text{NH}_2$  at the M06-2X/6-311+G(2df,2pd) level of theory

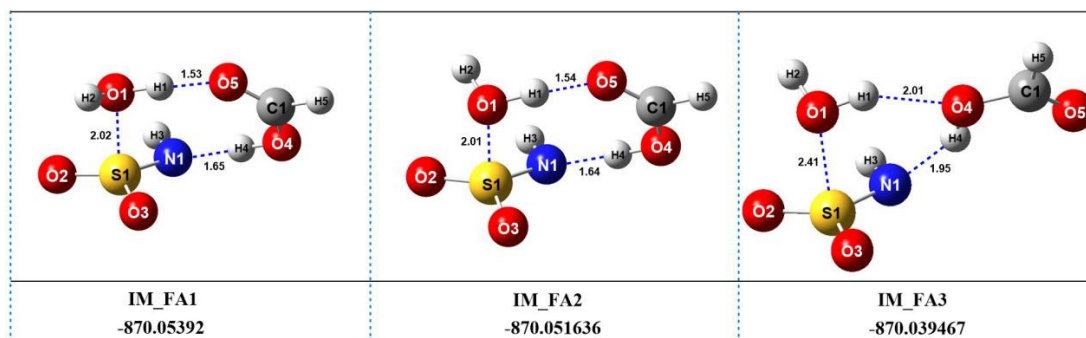

**Fig. S3** The optimized geometries and electric energies (in Hartree-Fock) for the complexes of  $\text{HNSO}_2 \cdots \text{H}_2\text{O} \cdots \text{HCOOH}$  at the M06-2X/6-311+G(2*df*,2*pd*) level of theory

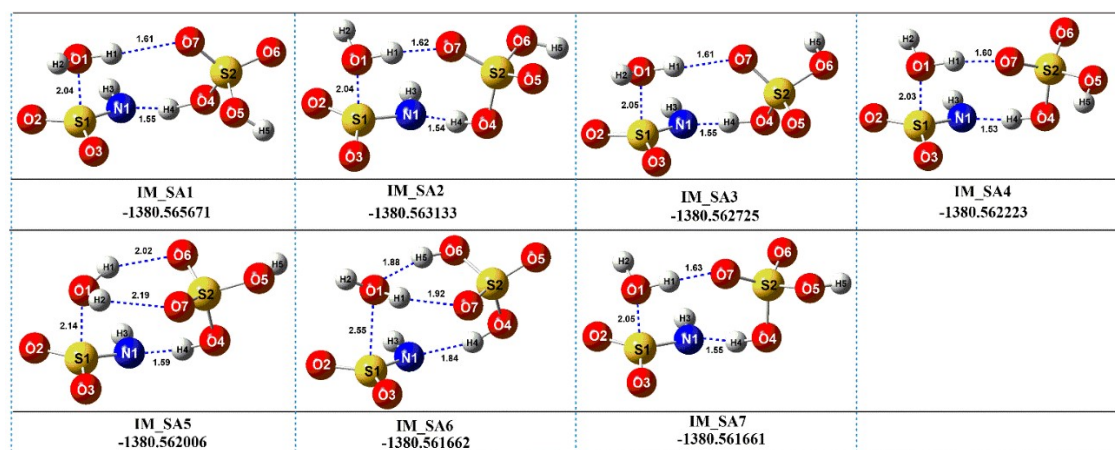

**Fig. S4** The optimized geometries and electric energies (in Hartree-Fock) for the complexes of  $\text{HNSO}_2 \cdots \text{H}_2\text{O} \cdots \text{H}_2\text{SO}_4$  at the M06-2X/6-311+G(2df,2pd) level of theory

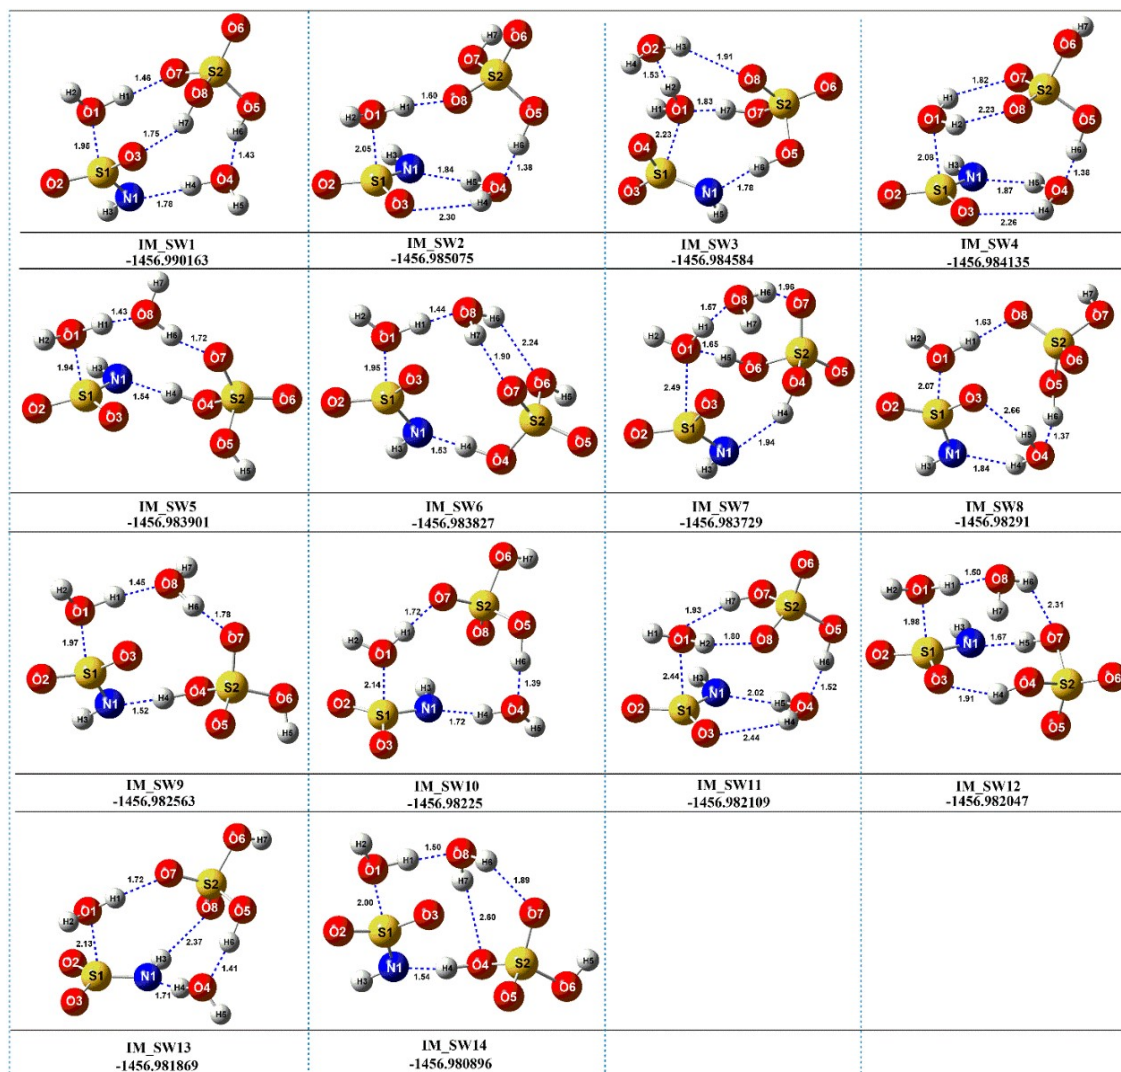

**Fig. S5** The optimized geometries and electric energies (in Hartree-Fock) for the complexes of  $\text{HNSO}_2 \cdots \text{H}_2\text{O} \cdots \text{H}_2\text{SO}_4 \cdots \text{H}_2\text{O}$  at the M06-2X/6-311+G(2df,2pd) level of theory



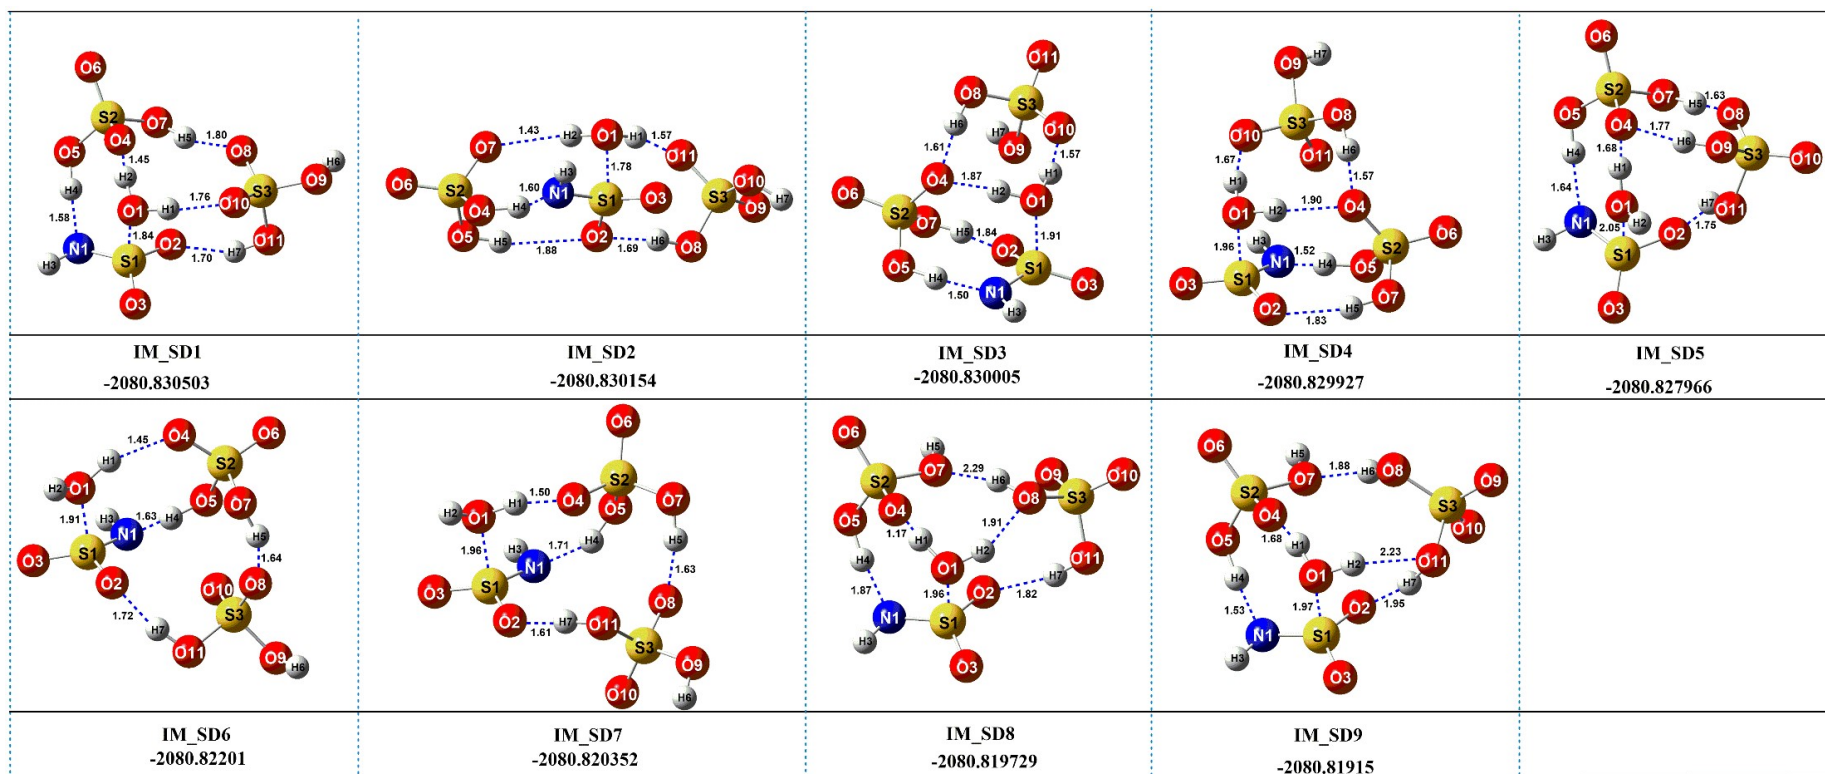

**Fig. S6** The optimized geometries and electric energies (in Hartree-Fock) for the complexes of  $\text{HNSO}_2 \cdots \text{H}_2\text{O} \cdots (\text{H}_2\text{SO}_4)_2$  at the M06-2X/6-311+G(2df,2pd) level of theory



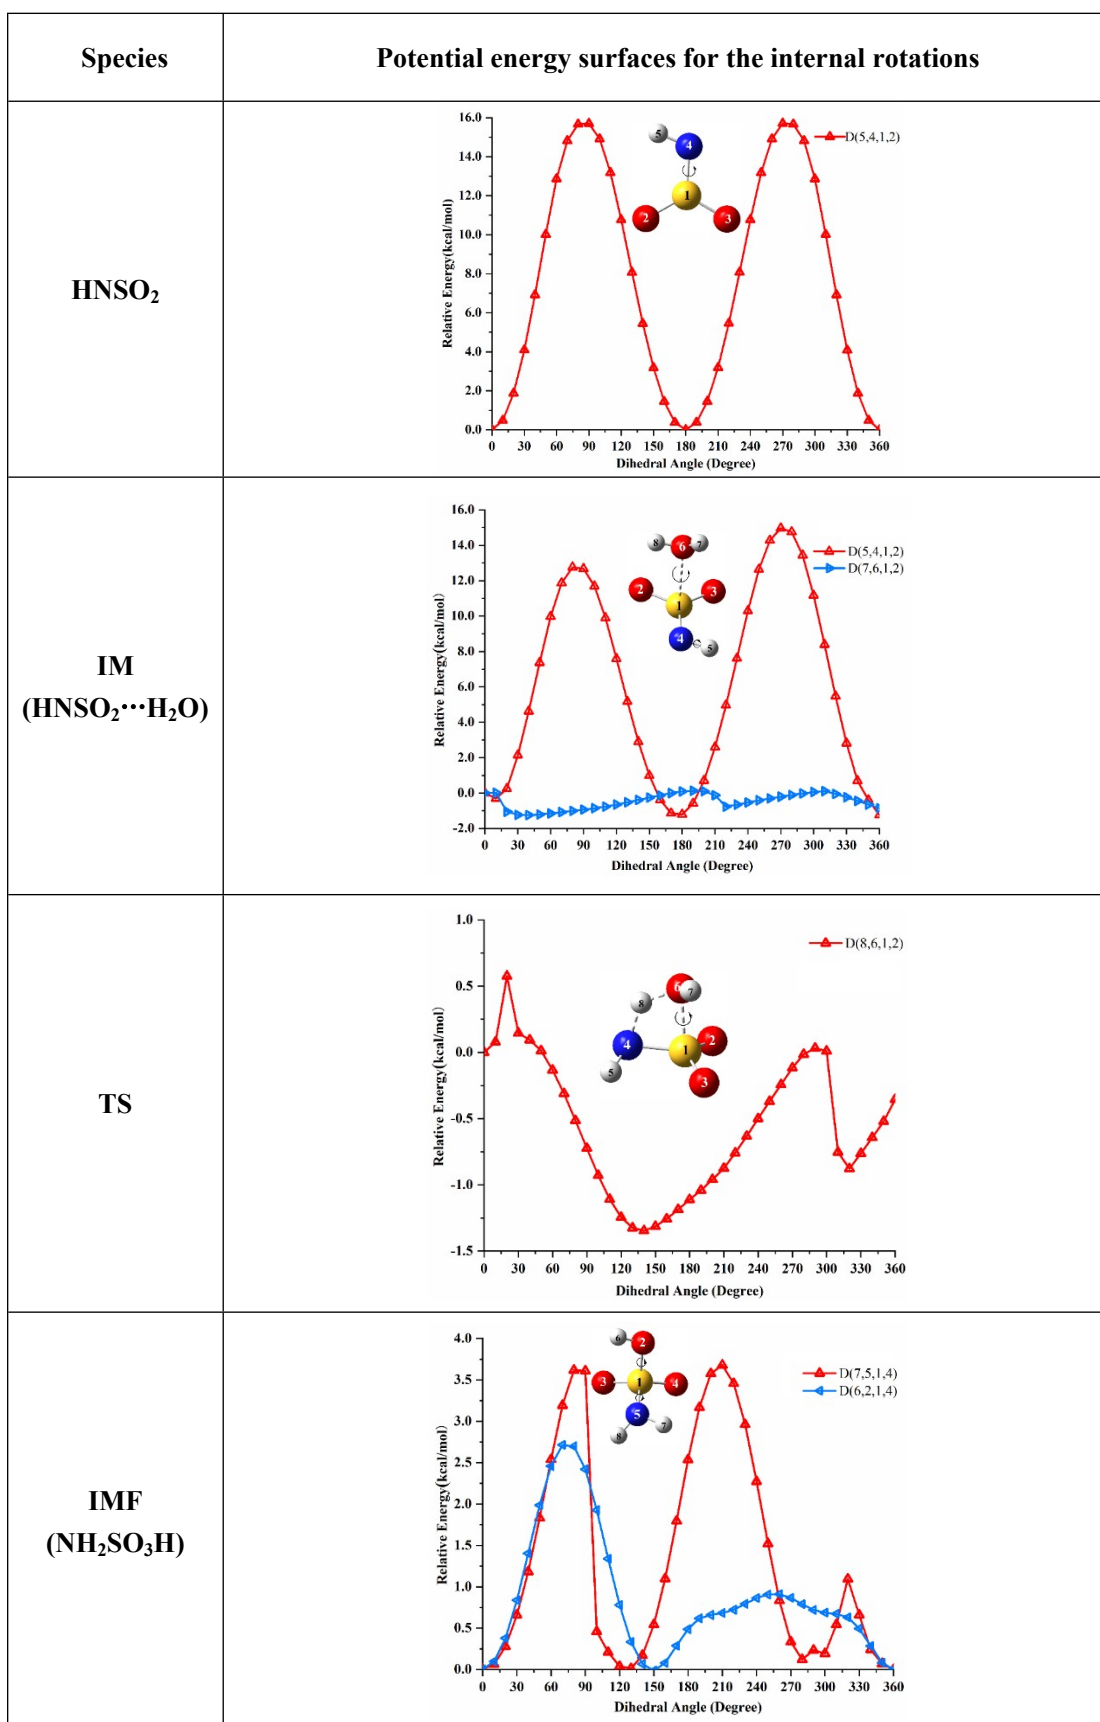

**Fig. S7** Hindrance potentials for HNSO<sub>2</sub>, IM (HNSO<sub>2</sub>···H<sub>2</sub>O), TS and IMF (NH<sub>2</sub>SO<sub>3</sub>H) calculated at the M06-2X/6-311+G(2df,2pd) level of theory

**Table S1** Zero point energy (ZPE/(kcal·mol<sup>-1</sup>)), entropies (S/(cal·mol<sup>-1</sup>·K<sup>-1</sup>)), relative energies ( $\Delta E$  and  $\Delta(E + ZPE)$ /(kcal·mol<sup>-1</sup>)), enthalpies ( $\Delta H(298)$ /(kcal·mol<sup>-1</sup>)), and free energies ( $\Delta G(298)$ /(kcal·mol<sup>-1</sup>)) for the hydrolysis reaction of HNSO<sub>2</sub> without and with catalyst  $X$  ( $X = \text{H}_2\text{O}$ ,  $(\text{H}_2\text{O})_2$ ,  $(\text{H}_2\text{O})_3$ ,  $\text{NH}_3$ ,  $\text{CH}_3\text{NH}_2$ ,  $\text{HCOOH}$ ,  $\text{H}_2\text{SO}_4$ ,  $\text{H}_2\text{SO}_4 \cdots \text{H}_2\text{O}$  and  $(\text{H}_2\text{SO}_4)_2$ )

| <i>Species</i>                                                                       | ZPE  | $\Delta E$                    | S     | $\Delta G$ | $\Delta(E + ZPE)$ | $\Delta H$ |
|--------------------------------------------------------------------------------------|------|-------------------------------|-------|------------|-------------------|------------|
| HNSO <sub>2</sub> + H <sub>2</sub> O                                                 | 28.7 | 0.0                           | 110.6 | 0.0        | 0.0               | 0.0        |
| IM                                                                                   | 30.4 | -6.0                          | 83.2  | 3.8        | -4.3              | -4.5       |
| TS                                                                                   | 29.2 | 20.2                          | 71.9  | 30.6       | 20.6              | 19.1       |
| NH <sub>2</sub> SO <sub>3</sub> H                                                    | 32.8 | -35.9                         | 73.2  | -22.0      | -31.8             | -33.2      |
| HNSO <sub>2</sub> + 2H <sub>2</sub> O                                                | 42.3 | 0.0                           | 155.7 | 0.0        | 0.0               | 0.0        |
| HNSO <sub>2</sub> + (H <sub>2</sub> O) <sub>2</sub>                                  | 44.8 | -5.0                          | 133.2 | 3.5        | -2.5              | -3.2       |
| HNSO <sub>2</sub> ⋯H <sub>2</sub> O + H <sub>2</sub> O                               | 44.0 | -6.0                          | 127.7 | 3.8        | -4.3              | -4.5       |
| IM_WM1                                                                               | 47.4 | -19.6<br>(-20.3) <sup>a</sup> | 89.1  | 3.6        | -14.5             | -16.2      |
| TS_WM1                                                                               | 45.8 | -11.2<br>(-12.1) <sup>a</sup> | 79.8  | 11.8       | -7.7              | -10.8      |
| IMF_WM1                                                                              | 48.3 | -44.5<br>(-42.9) <sup>a</sup> | 87.1  | -20.5      | -38.6             | -40.3      |
| NH <sub>2</sub> SO <sub>3</sub> H + H <sub>2</sub> O                                 | 46.4 | -35.9                         | 118.3 | -22.0      | -31.8             | -33.2      |
| HNSO <sub>2</sub> + H <sub>2</sub> O + (H <sub>2</sub> O) <sub>2</sub>               | 58.4 | 0.0                           | 178.3 | 0.0        | 0.0               | 0.0        |
| HNSO <sub>2</sub> + (H <sub>2</sub> O) <sub>3</sub>                                  | 61.5 | -10.7                         | 144.9 | 1.2        | -7.6              | -8.7       |
| HNSO <sub>2</sub> ⋯H <sub>2</sub> O + (H <sub>2</sub> O) <sub>2</sub>                | 60.1 | -6.0                          | 150.3 | 3.8        | -4.3              | -4.5       |
| IM_WD'                                                                               | 62.8 | -20.0                         | 140.9 | 4.8        | -15.6             | -16.7      |
| TS_WD'                                                                               | 62.1 | -17.1                         | 105.9 | 10.4       | -13.3             | -14.2      |
| IM_WD1                                                                               | 63.5 | -26.1<br>(-26.3) <sup>a</sup> | 89.1  | 0.2        | -20.9             | -23.0      |
| TS_WD1                                                                               | 62.1 | -22.6<br>(-23.5) <sup>a</sup> | 91.9  | 3.7        | -18.9             | -22.0      |
| IMF_WD1                                                                              | 64.1 | -51.6<br>(-52.5) <sup>a</sup> | 103.5 | -25.3      | -45.9             | -47.6      |
| NH <sub>2</sub> SO <sub>3</sub> H + (H <sub>2</sub> O) <sub>2</sub>                  | 62.5 | -35.9                         | 140.9 | -22.0      | -31.8             | -33.2      |
| HNSO <sub>2</sub> + 2(H <sub>2</sub> O) <sub>2</sub>                                 | 74.5 | 0.0                           | 200.9 | 0.0        | 0.0               | 0.0        |
| HNSO <sub>2</sub> + (H <sub>2</sub> O) <sub>4</sub>                                  | 77.4 | -16.4                         | 158.9 | -2.3       | -13.4             | -16.4      |
| HNSO <sub>2</sub> ⋯(H <sub>2</sub> O) <sub>2</sub> + (H <sub>2</sub> O) <sub>2</sub> | 77.9 | -14.6                         | 156.7 | 0.1        | -12.0             | -13.0      |
| IM_WT'                                                                               | 78.5 | -22.4                         | 126.9 | 2.5        | -18.4             | -22.4      |
| TS_WT'                                                                               | 79.6 | -22.0                         | 121.4 | 3.8        | -16.9             | -22.0      |
| IM_WT1                                                                               | 79.1 | -27.6<br>(-28.7) <sup>a</sup> | 114.4 | 0.5        | -23.0             | -27.6      |
| TS_WT1                                                                               | 78.3 | -26.3<br>(-28.7) <sup>a</sup> | 107.5 | 2.3        | -22.5             | -26.3      |
| IMF_WT1                                                                              | 79.7 | -53.3<br>(-54.6) <sup>a</sup> | 119.1 | -25.2      | -48.0             | -53.3      |

|                                                                                               |      |                              |       |       |                               |       |
|-----------------------------------------------------------------------------------------------|------|------------------------------|-------|-------|-------------------------------|-------|
| $\text{NH}_2\text{SO}_3\text{H} + (\text{H}_2\text{O})_3$                                     | 76.1 | -30.9                        | 208.4 | -25.5 | -29.3                         | -30.9 |
| $\text{HNSO}_2 + \text{H}_2\text{O} + \text{NH}_3$                                            | 50.4 | 0.0                          | 156.5 | 0.0   | 0.0                           | 0.0   |
| $\text{NH}_3 \cdots \text{H}_2\text{O} + \text{HNSO}_2$                                       | 52.9 | -6.4                         | 133.8 | 2.2   | -3.9<br>(-4.2) <sup>b</sup>   | -4.6  |
| $\text{HNSO}_2 \cdots \text{H}_2\text{O} + \text{NH}_3$                                       | 52.1 | -6.0                         | 128.6 | 3.8   | -4.3                          | -4.5  |
| IM_AM1                                                                                        | 55.0 | -19.6                        | 90.1  | 3.2   | -15.0                         | -16.6 |
| TS_AM1                                                                                        | 54.4 | -15.7                        | 82.5  | 7.8   | -11.7                         | -14.3 |
| IMF_AM1                                                                                       | 56.0 | -45.3                        | 92.4  | -22.1 | -39.8                         | -41.3 |
| $\text{NH}_2\text{SO}_3\text{H} + \text{NH}_3$                                                | 54.5 | -35.9                        | 119.2 | -22.0 | -31.8                         | -33.2 |
| $\text{HNSO}_2 + \text{H}_2\text{O} + \text{CH}_3\text{NH}_2$                                 | 69.1 | 0.0                          | 168.1 | 0.0   | 0.0                           | 0.0   |
| $\text{HNSO}_2 \cdots \text{H}_2\text{O} + \text{CH}_3\text{NH}_2$                            | 70.8 | -6.0                         | 140.2 | 3.8   | -4.3                          | -4.5  |
| $\text{CH}_3\text{NH}_2 \cdots \text{H}_2\text{O} + \text{HNSO}_2$                            | 71.3 | -7.2<br>(-7.73) <sup>c</sup> | 143.1 | 2.1   | -4.9                          | -5.4  |
| IM_MA1                                                                                        | 73.7 | -20.4                        | 97.1  | 4.1   | -15.8                         | -17.1 |
| TS_MA1                                                                                        | 72.7 | -19.3                        | 91.1  | 5.2   | -15.7                         | -17.7 |
| IMF_MA1                                                                                       | 74.3 | -46.4                        | 98.9  | -21.7 | -41.1                         | -42.4 |
| $\text{NH}_2\text{SO}_3\text{H} + \text{CH}_3\text{NH}_2$                                     | 73.2 | -35.9                        | 130.7 | -22.0 | -31.8                         | -33.2 |
| $\text{HNSO}_2 + \text{H}_2\text{O} + \text{HCOOH}$                                           | 50.3 | 0.0                          | 169.9 | 0.0   | 0.0                           | 0.0   |
| $\text{HNSO}_2 \cdots \text{H}_2\text{O} + \text{HCOOH}$                                      | 52.0 | -6.0                         | 141.9 | 3.8   | -4.3                          | -4.5  |
| $\text{HCOOH} \cdots \text{H}_2\text{O} + \text{HNSO}_2$                                      | 52.7 | -10.2                        | 139.2 | 0.7   | -7.7<br>(-8.06) <sup>d</sup>  | -8.5  |
| IM_FA'                                                                                        | 54.0 | -16.2                        | 101.9 | 7.2   | -12.5                         | -13.1 |
| TS_FA'                                                                                        | 52.5 | -13.7                        | 100.9 | 8.8   | -11.4                         | -11.8 |
| IM_FA1                                                                                        | 54.8 | -22.0                        | 95.2  | 3.3   | -17.5                         | -19.0 |
| TS_FA1                                                                                        | 52.4 | -19.4                        | 89.9  | 4.4   | -17.2                         | -19.4 |
| IMF_FA1                                                                                       | 55.4 | -49.4                        | 99.3  | -24.5 | -44.3                         | -45.5 |
| $\text{NH}_2\text{SO}_3\text{H} + \text{HCOOH}$                                               | 54.4 | -35.9                        | 132.5 | -22.0 | -31.8                         | -33.2 |
| $\text{HNSO}_2 + \text{H}_2\text{O} + t\text{-H}_2\text{SO}_4$                                | 54.0 | 0.0                          | 182.2 | 0.0   | 0.0                           | 0.0   |
| $\text{HNSO}_2 \cdots \text{H}_2\text{O} + t\text{-H}_2\text{SO}_4$                           | 55.7 | -6.0                         | 154.8 | 3.8   | -4.3                          | -4.5  |
| $t\text{-H}_2\text{SO}_4 \cdots \text{H}_2\text{O} + \text{HNSO}_2$                           | 55.9 | -12.3                        | 152.6 | -2.1  | -10.4<br>(-10.1) <sup>e</sup> | -11.0 |
| IM_SA'                                                                                        | 56.8 | -18.6                        | 144.8 | 1.8   | -15.8                         | -15.9 |
| TS_SA'                                                                                        | 57.9 | -18.3                        | 122.7 | 4.5   | -14.4                         | -16.6 |
| IM_SA1                                                                                        | 57.5 | -23.8                        | 108.8 | 0.4   | -20.4                         | -21.5 |
| TS_SA1                                                                                        | 55.7 | -22.2                        | 103.8 | 1.2   | -20.5                         | -22.2 |
| IMF_SA1                                                                                       | 58.7 | -49.5                        | 109.9 | -24.3 | -44.8                         | -45.9 |
| $\text{NH}_2\text{SO}_3\text{H} + t\text{-H}_2\text{SO}_4$                                    | 58.1 | -35.9                        | 144.8 | -22.0 | -31.8                         | -33.2 |
| $\text{HNSO}_2 + \text{H}_2\text{O} + c\text{-H}_2\text{SO}_4 \cdots \text{H}_2\text{O}$      | 70.2 | 0.0                          | 194.2 | 0.0   | 0.0                           | 0.0   |
| $c\text{-H}_2\text{SO}_4 \cdots \text{H}_2\text{O} + \text{HNSO}_2 \cdots \text{H}_2\text{O}$ | 71.9 | -6.0                         | 166.2 | 3.8   | -4.3                          | -4.5  |
| $c\text{-H}_2\text{SO}_4 \cdots (\text{H}_2\text{O})_2 + \text{HNSO}_2$                       | 72.6 | -12.5                        | 163.0 | -1.6  | -10.1                         | -10.9 |
| IM_SW'                                                                                        | 71.9 | -17.8                        | 156.8 | 2.8   | -16.1                         | -15.1 |

|                                                                                          |      |       |       |       |                               |       |
|------------------------------------------------------------------------------------------|------|-------|-------|-------|-------------------------------|-------|
| TS_SW'                                                                                   | 73.3 | -17.8 | 134.4 | 4.2   | -14.7                         | -15.7 |
| IM_SW1                                                                                   | 73.5 | -25.8 | 120.5 | -0.9  | -22.5                         | -24.0 |
| TS_SW1                                                                                   | 71.4 | -23.1 | 111.7 | 0.9   | -21.9                         | -24.3 |
| IMF_SW1                                                                                  | 74.7 | -50.3 | 122.7 | -26.0 | -45.9                         | -46.8 |
| NH <sub>2</sub> SO <sub>3</sub> H + c-H <sub>2</sub> SO <sub>4</sub> ···H <sub>2</sub> O | 74.3 | -35.9 | 156.8 | -22.0 | -31.8                         | -33.2 |
| <hr/>                                                                                    |      |       |       |       |                               |       |
| HNSO <sub>2</sub> + H <sub>2</sub> O + (H <sub>2</sub> SO <sub>4</sub> ) <sub>2</sub>    | 80.4 | 0.0   | 213.9 | 0.0   | 0.0                           | 0.0   |
| <hr/>                                                                                    |      |       |       |       |                               |       |
| HNSO <sub>2</sub> ···H <sub>2</sub> O + (H <sub>2</sub> SO <sub>4</sub> ) <sub>2</sub>   | 82.0 | -6.0  | 185.9 | 3.8   | -4.3                          | -4.5  |
| (H <sub>2</sub> SO <sub>4</sub> ) <sub>2</sub> ···H <sub>2</sub> O + HNSO <sub>2</sub>   | 81.8 | -12.6 | 183.0 | -2.7  | -11.2<br>(-11.6) <sup>e</sup> | -11.9 |
| IM_SD'                                                                                   | 82.3 | -19.1 | 146.3 | 2.4   | -17.2                         | -17.8 |
| TS_SD'                                                                                   | 81.6 | -17.1 | 143.7 | 4.6   | -15.9                         | -16.3 |
| IM_SD1                                                                                   | 83.5 | -24.1 | 136.2 | 0.9   | -21.0                         | -22.3 |
| TS_SD1                                                                                   | 81.4 | -22.4 | 132.2 | 1.1   | -21.3                         | -23.2 |
| IMF_SD1                                                                                  | 84.7 | -49.6 | 134.9 | -23.0 | -45.2                         | -46.5 |
| <hr/>                                                                                    |      |       |       |       |                               |       |
| NH <sub>2</sub> SO <sub>3</sub> H + (H <sub>2</sub> SO <sub>4</sub> ) <sub>2</sub>       | 84.5 | -35.9 | 176.5 | -22.0 | -31.8                         | -33.2 |

<sup>a</sup> The value was taken from reference (*Int. J. Quantum Chem.*, 2020, **120**, e26182)

<sup>b</sup> The value was taken from reference (*Int. J. Quantum Chem.*, 2021, **121**, e26432)

<sup>c</sup> The value was taken from reference (*Entropy*, 2015, **17**, 2764-2780)

<sup>d</sup> The value was taken from reference (*ChemPhysChem*, 2012, **13**, 323-329)

<sup>e</sup> The value was taken from reference (*Atmos. Environ.*, 2020, **243**, 117876)

**Table S2** Equilibrium constants ( $\text{cm}^3\cdot\text{molecule}^{-1}$ ) for  $\text{HNSO}_2\cdots\text{H}_2\text{O}$ ,  $(\text{H}_2\text{O})_2$ ,  $\text{HNSO}_2\cdots(\text{H}_2\text{O})_2$ ,  $(\text{H}_2\text{O})_3$ ,  $(\text{H}_2\text{O})_4$ ,  $\text{NH}_3\cdots\text{H}_2\text{O}$ ,  $\text{CH}_3\text{NH}_2\cdots\text{H}_2\text{O}$ ,  $\text{HCOOH}\cdots\text{H}_2\text{O}$ ,  $t\text{-H}_2\text{SO}_4\cdots\text{H}_2\text{O}$ ,  $c\text{-H}_2\text{SO}_4\cdots\text{H}_2\text{O}$ ,  $c\text{-H}_2\text{SO}_4\cdots(\text{H}_2\text{O})_2$ ,  $(\text{H}_2\text{SO}_4)_2$  and  $(\text{H}_2\text{SO}_4)_2\cdots\text{H}_2\text{O}$  within the temperature range of 280-320 K

| $T/\text{K}$ | $\text{HNSO}_2\cdots\text{H}_2\text{O}$               | $(\text{H}_2\text{O})_2$                         | $\text{HNSO}_2\cdots(\text{H}_2\text{O})_2$         | $(\text{H}_2\text{O})_3$                          | $(\text{H}_2\text{O})_4$                          |
|--------------|-------------------------------------------------------|--------------------------------------------------|-----------------------------------------------------|---------------------------------------------------|---------------------------------------------------|
| 280          | 1.11E-22                                              | 3.56E-21                                         | 1.29E-21                                            | 1.98E-20                                          | 6.68E-18                                          |
| 290          | 8.75E-23                                              | 3.02E-21                                         | 7.60E-22                                            | 1.21E-20                                          | 3.38E-18                                          |
| 298          | 7.32E-23                                              | 2.68E-21<br>(2.34E-21) <sup>a</sup>              | 5.11E-22                                            | 8.40E-21<br>(4.55E-20) <sup>a</sup>               | 2.03E-18<br>(6.23E-18) <sup>a</sup>               |
| 300          | 7.01E-23                                              | 2.60E-21                                         | 4.64E-22                                            | 7.69E-21                                          | 1.79E-18                                          |
| 310          | 5.71E-23                                              | 2.26E-21                                         | 2.93E-22                                            | 5.03E-21                                          | 9.89E-19                                          |
| 320          | 4.73E-23                                              | 1.99E-21                                         | 1.91E-22                                            | 3.38E-21                                          | 5.68E-19                                          |
| $T/\text{K}$ | $\text{NH}_3\cdots\text{H}_2\text{O}$                 | $\text{CH}_3\text{NH}_2\cdots\text{H}_2\text{O}$ | $\text{HCOOH}\cdots\text{H}_2\text{O}$              | $t\text{-H}_2\text{SO}_4\cdots\text{H}_2\text{O}$ | $c\text{-H}_2\text{SO}_4\cdots\text{H}_2\text{O}$ |
| 280          | 5.23E-22                                              | 1.92E-22                                         | 4.98E-20                                            | 2.65E-18                                          | 1.55E-19                                          |
| 290          | 4.08E-22                                              | 1.43E-22                                         | 3.02E-20                                            | 1.36E-18                                          | 6.59E-20                                          |
| 298          | 3.79E-22<br>(3.91E-22) <sup>b</sup>                   | 1.14E-22                                         | 2.07E-20<br>(1.10E-20) <sup>c</sup>                 | 8.29E-19<br>(3.88E-19) <sup>d</sup>               | 4.10E-20<br>(5.16E-20) <sup>d</sup>               |
| 300          | 3.23E-22                                              | 1.08E-22                                         | 1.13E-20                                            | 7.35E-19                                          | 3.69E-20                                          |
| 310          | 2.61E-22                                              | 8.38E-23                                         | 1.23E-20                                            | 4.13E-19                                          | 2.21E-20                                          |
| 320          | 2.14E-22                                              | 6.60E-23                                         | 8.18E-21                                            | 2.41E-19                                          | 1.37E-20                                          |
| $T/\text{K}$ | $c\text{-H}_2\text{SO}_4\cdots(\text{H}_2\text{O})_2$ | $(\text{H}_2\text{SO}_4)_2$                      | $(\text{H}_2\text{SO}_4)_2\cdots\text{H}_2\text{O}$ |                                                   |                                                   |
| 280          | 8.91E-16                                              | 6.54E-15                                         | 1.47E-17                                            |                                                   |                                                   |
| 290          | 3.30E-16                                              | 4.68E-15                                         | 7.22E-18                                            |                                                   |                                                   |
| 298          | 1.57E-16<br>(1.54E-15) <sup>d</sup>                   | 2.01E-15<br>(1.02E-16) <sup>d</sup>              | 4.24E-18<br>(4.06E-17) <sup>d</sup>                 |                                                   |                                                   |
| 300          | 1.34E-16                                              | 1.63E-15                                         | 3.72E-18                                            |                                                   |                                                   |
| 310          | 5.51E-17                                              | 6.11E-16                                         | 2.01E-18                                            |                                                   |                                                   |
| 320          | 2.50E-17                                              | 2.43E-16                                         | 1.13E-18                                            |                                                   |                                                   |

The equilibrium constants ( $\text{cm}^3\cdot\text{molecule}^{-1}$ ) for the complexes involved in Table S2 were performed by ILT method in Mesmer code;

<sup>a</sup> The value was taken from reference (*J. Am. Chem. Soc.*, 2012, **134**, 20632-20644)

<sup>b</sup> The value was taken from reference (*Comput. Theor. Chem.*, 2020, **1176**, 112747)

<sup>c</sup> The value was taken from reference (*ChemPhysChem.*, 2012, **13**, 323-329)

<sup>d</sup> The value was taken from reference (*J. Phys. Chem. A*, 2021, **125**, 2642-2652)

**Table S3** Concentrations (molecules·cm<sup>-3</sup>) of (H<sub>2</sub>O)<sub>2</sub>, (H<sub>2</sub>O)<sub>3</sub>, NH<sub>3</sub>···H<sub>2</sub>O, CH<sub>3</sub>NH<sub>2</sub>···H<sub>2</sub>O, HCOOH···H<sub>2</sub>O, *t*-H<sub>2</sub>SO<sub>4</sub>···H<sub>2</sub>O, *c*-H<sub>2</sub>SO<sub>4</sub>···H<sub>2</sub>O, *c*-H<sub>2</sub>SO<sub>4</sub>···(H<sub>2</sub>O)<sub>2</sub> and (H<sub>2</sub>SO<sub>4</sub>)<sub>2</sub> within the temperature range of 280-320 K<sup>a</sup>

| Catalysts                                                    | RH     | 280 K                              | 290 K    | 298 K                                                          | 300 K                               | 310 K    | 320 K    |          |
|--------------------------------------------------------------|--------|------------------------------------|----------|----------------------------------------------------------------|-------------------------------------|----------|----------|----------|
| (H <sub>2</sub> O) <sub>2</sub>                              | 20%RH  | 9.48E+12                           | 2.78E+13 | 6.03E+13<br>(5.44E+13) <sup>b</sup>                            | 7.69E+13                            | 1.93E+14 | 4.40E+14 |          |
|                                                              | 40%RH  | 3.78E+13                           | 1.10E+14 | 2.58E+14<br>(2.18E+14) <sup>b</sup>                            | 3.06E+14                            | 7.71E+14 | 1.76E+15 |          |
|                                                              | 60%RH  | 8.55E+13                           | 2.49E+14 | 5.43E+14<br>(4.90E+14) <sup>b</sup>                            | 6.90E+14                            | 1.74E+15 | 3.96E+15 |          |
|                                                              | 80%RH  | 1.53E+14                           | 4.41E+14 | 1.03E+15<br>(8.70E+14) <sup>b</sup>                            | 1.22E+15                            | 3.09E+15 | 7.03E+15 |          |
|                                                              | 100%RH | 2.37E+14                           | 6.90E+14 | 1.59E+15<br>(1.36E+15) <sup>b</sup><br>(1.72E+15) <sup>g</sup> | 1.91E+15                            | 4.82E+15 | 1.10E+16 |          |
| (H <sub>2</sub> O) <sub>3</sub>                              | 20%RH  | 9.68E+09                           | 3.23E+10 | 7.60E+10<br>(3.83E+11) <sup>b</sup>                            | 1.02E+11                            | 2.83E+11 | 6.98E+11 |          |
|                                                              | 40%RH  | 7.70E+10                           | 2.55E+11 | 6.71E+11<br>(3.06E+12) <sup>b</sup>                            | 8.07E+11                            | 2.26E+12 | 5.59E+12 |          |
|                                                              | 60%RH  | 2.62E+11                           | 8.64E+11 | 2.05E+12<br>(1.03E+13) <sup>b</sup>                            | 2.73E+12                            | 7.67E+12 | 1.89E+13 |          |
|                                                              | 80%RH  | 6.25E+11                           | 2.04E+12 | 5.37E+12<br>(2.45E+13) <sup>b</sup>                            | 6.45E+12                            | 1.82E+13 | 4.47E+13 |          |
|                                                              | 100%RH | 1.21E+12                           | 3.99E+12 | 1.03E+13<br>(4.78E+13) <sup>b</sup>                            | 1.26E+13                            | 3.54E+13 | 8.73E+13 |          |
| NH <sub>3</sub> ···H <sub>2</sub> O                          | 20%RH  | 0.1 ppbv                           | 1.42E+05 | 1.98E+05                                                       | 2.80E+05                            | 2.71E+05 | 3.60E+05 | 4.61E+05 |
|                                                              |        | 10 ppbv                            | 1.42E+07 | 1.98E+07                                                       | 2.80E+07                            | 2.71E+07 | 3.60E+07 | 4.61E+07 |
|                                                              |        | 2900ppbv                           | 4.12E+09 | 5.72E+09                                                       | 8.07E+09                            | 7.89E+09 | 1.05E+10 | 1.35E+10 |
|                                                              | 100%RH | 0.1 ppbv                           | 7.10E+05 | 9.87E+05                                                       | 1.44E+06                            | 1.35E+06 | 1.80E+06 | 2.30E+06 |
|                                                              |        | 10 ppbv                            | 7.10E+07 | 9.87E+07                                                       | 1.44E+08<br>(3.59E+08) <sup>c</sup> | 1.35E+08 | 1.80E+08 | 2.30E+08 |
|                                                              |        | 2900pbv                            | 2.06E+10 | 2.85E+10                                                       | 4.14E+10                            | 3.94E+10 | 5.26E+10 | 6.74E+10 |
| CH <sub>3</sub> NH <sub>2</sub> ···H <sub>2</sub> O          | 20%RH  | 80 ppbv                            | 7.14E+05 | 9.90E+05                                                       | 1.23E+06                            | 1.34E+06 | 1.76E+06 | 2.24E+06 |
|                                                              |        | 180 ppbv                           | 1.60E+06 | 2.22E+06                                                       | 2.77E+06                            | 3.01E+06 | 3.96E+06 | 5.03E+06 |
|                                                              | 100%RH | 80 ppbv                            | 3.57E+06 | 4.93E+06                                                       | 6.33E+06                            | 6.68E+06 | 8.82E+06 | 1.12E+07 |
|                                                              |        | 180 ppbv                           | 8.02E+06 | 1.11E+07                                                       | 1.42E+07                            | 1.50E+07 | 1.98E+07 | 2.51E+07 |
| HCOOH···H <sub>2</sub> O                                     | 20%RH  | 0.01ppbv                           | 6.74E+05 | 7.33E+05                                                       | 7.65E+05                            | 7.95E+05 | 8.46E+05 | 8.81E+05 |
|                                                              |        | 10 ppbv                            | 6.74E+08 | 7.33E+08                                                       | 7.65E+08                            | 7.95E+08 | 8.46E+08 | 8.81E+08 |
|                                                              | 100%RH | 0.01ppbv                           | 3.37E+06 | 3.65E+06                                                       | 3.93E+06                            | 3.97E+06 | 4.23E+06 | 4.40E+06 |
|                                                              |        | 10 ppbv                            | 3.37E+09 | 3.65E+09                                                       | 3.93E+09<br>(3.16E+09) <sup>c</sup> | 3.97E+09 | 4.23E+09 | 4.40E+09 |
| <i>t</i> -H <sub>2</sub> SO <sub>4</sub> ···H <sub>2</sub> O | 20%RH  | [SA] <sup>f</sup> =10 <sup>8</sup> | 5.33E+07 | 4.96E+07                                                       | 4.60E+07                            | 4.68E+07 | 4.34E+07 | 3.85E+07 |
|                                                              |        | [SA] <sup>f</sup> =10 <sup>6</sup> | 5.33E+05 | 4.96E+05                                                       | 4.60E+05                            | 4.55E+05 | 4.22E+05 | 3.85E+05 |

|                                                                           |        |                                    |          |          |                         |          |          |          |
|---------------------------------------------------------------------------|--------|------------------------------------|----------|----------|-------------------------|----------|----------|----------|
|                                                                           |        | [SA] <sup>f</sup> =10 <sup>4</sup> | 5.33E+03 | 4.96E+03 | 4.60E+03                | 4.55E+03 | 4.22E+03 | 3.85E+03 |
|                                                                           |        |                                    |          |          | 2.36E+08                |          |          |          |
|                                                                           | 100%RH | [SA] <sup>f</sup> =10 <sup>8</sup> | 2.67E+08 | 2.47E+08 | (2.40E+07) <sup>d</sup> | 2.27E+08 | 2.11E+08 | 1.93E+08 |
|                                                                           |        |                                    |          |          | (1.11E+08) <sup>e</sup> |          |          |          |
|                                                                           |        | [SA] <sup>f</sup> =10 <sup>6</sup> | 2.67E+06 | 2.47E+06 | 2.36E+06                | 2.27E+06 | 2.11E+06 | 1.93E+06 |
|                                                                           |        | [SA] <sup>f</sup> =10 <sup>4</sup> | 2.67E+04 | 2.47E+04 | 2.36E+04                | 2.27E+04 | 2.11E+04 | 1.93E+04 |
|                                                                           |        |                                    |          |          |                         |          |          |          |
|                                                                           | 20%RH  | [SA] <sup>f</sup> =10 <sup>8</sup> | 3.12E+06 | 2.40E+06 | 2.28E+06                | 2.28E+06 | 2.26E+06 | 2.19E+06 |
|                                                                           |        | [SA] <sup>f</sup> =10 <sup>6</sup> | 3.12E+04 | 2.40E+04 | 2.28E+04                | 2.28E+04 | 2.26E+04 | 2.19E+04 |
|                                                                           |        | [SA] <sup>f</sup> =10 <sup>4</sup> | 3.12E+02 | 2.40E+02 | 2.28E+02                | 2.28E+02 | 2.26E+02 | 2.19E+02 |
|                                                                           |        |                                    |          |          |                         |          |          |          |
| <i>c</i> -H <sub>2</sub> SO <sub>4</sub> ⋯H <sub>2</sub> O                |        |                                    |          |          |                         |          |          |          |
|                                                                           | 100%RH | [SA] <sup>f</sup> =10 <sup>8</sup> | 1.56E+07 | 1.20E+07 | 1.17E+07                | 1.14E+07 | 1.13E+07 | 1.09E+07 |
|                                                                           |        |                                    |          |          | (1.47E+07) <sup>e</sup> |          |          |          |
|                                                                           |        | [SA] <sup>f</sup> =10 <sup>6</sup> | 1.56E+05 | 1.20E+05 | 1.17E+05                | 1.14E+05 | 1.13E+05 | 1.09E+05 |
|                                                                           |        | [SA] <sup>f</sup> =10 <sup>4</sup> | 1.56E+03 | 1.20E+03 | 1.17E+03                | 1.14E+03 | 1.13E+03 | 1.09E+03 |
|                                                                           |        |                                    |          |          |                         |          |          |          |
|                                                                           | 20%RH  | [SA] <sup>f</sup> =10 <sup>8</sup> | 2.53E+06 | 2.75E+06 | 2.83E+06                | 3.09E+06 | 3.18E+06 | 3.29E+06 |
|                                                                           |        | [SA] <sup>f</sup> =10 <sup>6</sup> | 2.53E+04 | 2.75E+04 | 2.83E+04                | 3.09E+04 | 3.18E+04 | 3.29E+04 |
|                                                                           |        | [SA] <sup>f</sup> =10 <sup>4</sup> | 2.53E+02 | 2.75E+02 | 2.83E+02                | 3.09E+02 | 3.18E+02 | 3.29E+02 |
|                                                                           |        |                                    |          |          |                         |          |          |          |
| <i>c</i> -H <sub>2</sub> SO <sub>4</sub> ⋯(H <sub>2</sub> O) <sub>2</sub> |        |                                    |          |          |                         |          |          |          |
|                                                                           | 100%RH | [SA] <sup>f</sup> =10 <sup>8</sup> | 6.33E+07 | 6.83E+07 | 7.46E+07                | 7.68E+07 | 7.96E+07 | 8.23E+07 |
|                                                                           |        |                                    |          |          | (6.27E+07) <sup>e</sup> |          |          |          |
|                                                                           |        | [SA] <sup>f</sup> =10 <sup>6</sup> | 6.33E+05 | 6.83E+05 | 7.46E+05                | 7.68E+05 | 7.96E+05 | 8.23E+05 |
|                                                                           |        | [SA] <sup>f</sup> =10 <sup>4</sup> | 6.33E+03 | 6.83E+03 | 7.46E+03                | 7.68E+03 | 7.96E+03 | 8.23E+03 |
|                                                                           |        |                                    |          |          |                         |          |          |          |
| (H <sub>2</sub> SO <sub>4</sub> ) <sub>2</sub>                            |        | [SA] <sup>f</sup> =10 <sup>8</sup> | 9.95E+02 | 6.76E+02 | 2.75E+02                | 2.11E+02 | 7.48E+01 | 2.81E+01 |
|                                                                           |        |                                    |          |          | (1.40E+01) <sup>e</sup> |          |          |          |
|                                                                           |        | [SA] <sup>f</sup> =10 <sup>6</sup> | 9.95E-02 | 6.76E-02 | 2.75E-02                | 2.11E-02 | 7.48E-03 | 2.81E-03 |
|                                                                           |        | [SA] <sup>f</sup> =10 <sup>4</sup> | 9.95E-06 | 6.76E-06 | 2.75E-06                | 2.11E-06 | 7.48E-07 | 2.81E-07 |

<sup>a</sup> All of the energies in the calculated equilibrium constant in Table S3 were computed at the CCSD(T)-F12/cc-pVDZ-F12 level, while the partition functions were obtained at the M06-2X/6-311+G(2df,2pd) level.

<sup>b</sup> The values was reported from reference (*J. Phys. Chem. A*, 2013, **117**, 10381-10396)

<sup>c</sup> The values was taken from reference (*J. Phys. Chem. A*, 2010, **114**, 5796-580)

<sup>d</sup> The values was taken from reference (*Environ. Sci. Technol.*, 2015, **49**, 13112-13120)

<sup>e</sup> The values was taken from reference (*J. Phys. Chem. A*, 2021, **125**, 2642-2652)

<sup>f</sup> The values was taken from reference (*Proc. Natl. Acad. Sci. U. S. A.*, 2019, **116**, 24966-24971)



**Table S4** Rate coefficients ( $\text{cm}^3 \cdot \text{molecules}^{-1} \cdot \text{s}^{-1}$ ) for the  $\text{HNSO}_2 + \text{H}_2\text{O}$  reaction without and with  $X$  calculated by canonical variational transition (CVT) state theory with small curvature tunneling (SCT) correction within the temperature range of 280-320 K

| Reaction                       | $T$ (K)           | 280      | 290      | 298      | 300      | 310      | 320      |
|--------------------------------|-------------------|----------|----------|----------|----------|----------|----------|
| Channel R1                     | $K_{\text{eq}}$   | 6.94E-23 | 5.41E-23 | 4.50E-23 | 4.31E-23 | 3.49E-23 | 2.87E-23 |
|                                | $k_{\text{uni}}$  | 5.39E-06 | 1.19E-05 | 2.25E-05 | 2.64E-05 | 5.89E-05 | 1.31E-04 |
|                                | $k_{\text{b}}$    | 3.74E-28 | 6.43E-28 | 1.01E-27 | 1.14E-27 | 2.05E-27 | 3.75E-27 |
| Channel WM                     | $K_{\text{eq}}$   | 7.29E-22 | 4.33E-22 | 2.92E-22 | 2.66E-22 | 1.69E-22 | 1.10E-22 |
|                                | $k_{\text{uni}}$  | 5.64E+06 | 7.77E+06 | 9.89E+06 | 1.05E+07 | 1.39E+07 | 1.81E+07 |
|                                | $k_{\text{b}}$    | 4.11E-15 | 3.36E-15 | 2.89E-15 | 2.79E-15 | 2.35E-15 | 2.00E-15 |
| Channel WD<br>(one-step route) | $K_{\text{eq}}$   | 6.70E-19 | 2.66E-19 | 1.33E-19 | 1.12E-19 | 5.02E-20 | 2.35E-20 |
|                                | $k_{\text{uni}}$  | 3.53E+10 | 3.83E+10 | 4.07E+10 | 4.13E+10 | 4.43E+10 | 4.72E+10 |
|                                | $k_{\text{WD}_o}$ | 2.36E-08 | 1.02E-08 | 5.41E-09 | 4.64E-09 | 2.22E-09 | 1.11E-09 |
| Channel WT<br>(one-step route) | $K_{\text{eq}}$   | 9.74E-18 | 4.01E-18 | 2.06E-18 | 1.75E-18 | 8.05E-19 | 3.89E-19 |
|                                | $k_{\text{uni}}$  | 3.65E+11 | 3.69E+11 | 3.72E+11 | 3.73E+11 | 3.77E+11 | 3.80E+11 |
|                                | $k_{\text{WD}_o}$ | 3.55E-06 | 1.48E-06 | 7.66E-07 | 6.53E-07 | 3.03E-07 | 1.48E-07 |
| Channel AM                     | $K_{\text{eq}}$   | 2.66E-21 | 1.41E-21 | 8.80E-22 | 7.85E-22 | 4.53E-22 | 2.71E-22 |
|                                | $k_{\text{uni}}$  | 2.96E+10 | 3.21E+10 | 3.41E+10 | 3.46E+10 | 3.72E+10 | 3.97E+10 |
|                                | $k_{\text{b}}$    | 7.88E-11 | 4.54E-11 | 3.00E-11 | 2.72E-11 | 1.68E-11 | 1.08E-11 |
| Channel MA                     | $K_{\text{eq}}$   | 4.07E-21 | 2.05E-21 | 1.23E-21 | 1.08E-21 | 5.98E-22 | 3.42E-22 |
|                                | $k_{\text{uni}}$  | 9.87E+11 | 9.80E+11 | 9.76E+11 | 9.74E+11 | 9.68E+11 | 9.63E+11 |
|                                | $k_{\text{b}}$    | 4.02E-09 | 2.01E-09 | 1.20E-09 | 1.06E-09 | 5.79E-10 | 3.29E-10 |
| Channel FA<br>(one-step route) | $K_{\text{eq}}$   | 4.60E-19 | 1.95E-19 | 1.02E-19 | 8.72E-20 | 4.11E-20 | 2.04E-20 |
|                                | $k_{\text{uni}}$  | 1.13E+12 | 1.13E+12 | 1.13E+12 | 1.13E+12 | 1.14E+12 | 1.14E+12 |
|                                | $k_{\text{FA}_o}$ | 5.19E-07 | 2.20E-07 | 1.15E-07 | 9.89E-08 | 4.67E-08 | 2.31E-08 |
| Channel SA<br>(one-step route) | $K_{\text{eq}}$   | 8.16E-17 | 2.95E-17 | 1.38E-17 | 1.15E-17 | 4.72E-18 | 2.06E-18 |
|                                | $k_{\text{uni}}$  | 7.36E+11 | 7.79E+11 | 8.13E+11 | 8.21E+11 | 8.62E+11 | 9.02E+11 |
|                                | $k_{\text{SA}_o}$ | 6.01E-05 | 2.30E-05 | 1.12E-05 | 9.40E-06 | 4.07E-06 | 1.86E-06 |
| Channel SW<br>(one-step route) | $K_{\text{eq}}$   | 7.04E-18 | 2.58E-18 | 1.21E-18 | 1.01E-18 | 4.21E-19 | 1.85E-19 |
|                                | $k_{\text{uni}}$  | 1.45E+12 | 1.47E+12 | 1.48E+12 | 1.48E+12 | 1.50E+12 | 1.51E+12 |
|                                | $k_{\text{SW}_o}$ | 1.02E-05 | 3.79E-06 | 1.80E-06 | 1.50E-06 | 6.30E-07 | 2.79E-07 |
| Channel SD<br>(one-step route) | $K_{\text{eq}}$   | 3.16E-18 | 1.30E-18 | 6.69E-19 | 5.69E-19 | 2.63E-19 | 1.28E-19 |
|                                | $k_{\text{uni}}$  | 6.54E+12 | 6.61E+12 | 6.66E+12 | 6.67E+12 | 6.73E+12 | 6.78E+12 |
|                                | $k_{\text{SD}_o}$ | 2.07E-05 | 8.60E-06 | 4.45E-06 | 3.80E-06 | 1.77E-06 | 8.65E-07 |

$k_{\text{WD}_o}$ ,  $k_{\text{WT}_o}$ ,  $k_{\text{FA}_o}$ ,  $k_{\text{SA}_o}$ ,  $k_{\text{SW}_o}$  and  $k_{\text{SD}_o}$  are respectively the bimolecular rate coefficients for the one-step routes of the hydrolysis reaction of  $\text{HNSO}_2$  with  $(\text{H}_2\text{O})_2$ ,  $(\text{H}_2\text{O})_3$ ,  $\text{HCOOH}$ ,  $\text{H}_2\text{SO}_4$ ,  $\text{H}_2\text{SO}_4 \cdots \text{H}_2\text{O}$  and  $(\text{H}_2\text{SO}_4)_2$ .

**Table S5** Rate coefficients ( $\text{cm}^3 \cdot \text{molecules}^{-1} \cdot \text{s}^{-1}$ ) for the hydrolysis reaction of  $\text{HNSO}_2$  without and with  $X$  and the available calculated rate ratio ( $v_s/v_o$ ) between stepwise route and the corresponding one-step process calculated by master equation within the temperature range of 280-320 K

| Reaction      | $T$ (K)                           | 280                      | 290      | 298      | 300      | 310      | 320      |          |
|---------------|-----------------------------------|--------------------------|----------|----------|----------|----------|----------|----------|
| Channel<br>R1 | $K_{\text{eq(IM1)}}$              | 1.11E-22                 | 8.75E-23 | 7.32E-23 | 7.01E-23 | 5.71E-23 | 4.73E-23 |          |
|               | $k_{\text{uni(TS1)}}$             | 3.98E-06                 | 8.46E-06 | 1.56E-05 | 1.82E-05 | 3.96E-05 | 8.57E-05 |          |
|               | $k_{\text{R1}}$                   | 4.42E-28                 | 7.40E-28 | 1.14E-27 | 1.28E-27 | 2.26E-27 | 4.05E-27 |          |
| Channel<br>WM | $K_{\text{eq(IM_WM1)}}$           | 1.29E-21                 | 7.60E-22 | 5.11E-22 | 4.64E-22 | 2.93E-22 | 1.91E-22 |          |
|               | $k_{\text{uni(TS_WM1)}}$          | 5.13E+06                 | 7.00E+06 | 8.85E+06 | 9.37E+06 | 1.23E+07 | 1.60E+07 |          |
|               | $k_{\text{WM}}$                   | 6.61E-15                 | 5.32E-15 | 4.52E-15 | 4.35E-15 | 3.62E-15 | 3.06E-15 |          |
| One-step      | $K_{\text{eq(IM_WD1)}}$           | 3.52E-20                 | 1.98E-20 | 1.27E-20 | 1.10E-20 | 5.52E-21 | 2.89E-21 |          |
|               | $k_{\text{uni(TS_WD1)}}$          | 2.03E+10                 | 2.18E+10 | 2.30E+10 | 2.33E+10 | 2.48E+10 | 2.63E+10 |          |
|               | $k_{\text{WD}_o}$                 | 7.14E-10                 | 4.32E-10 | 2.92E-10 | 2.57E-10 | 1.37E-10 | 7.61E-11 |          |
| Channel<br>WD | $K_{\text{eq(IM_WD')}}$           | 1.30E-21                 | 8.15E-22 | 5.77E-22 | 5.31E-22 | 3.56E-22 | 2.46E-22 |          |
|               | $k_{\text{uni(TS_WD')}}$          | 2.11E+11                 | 2.50E+11 | 2.84E+11 | 2.93E+11 | 3.39E+11 | 3.90E+11 |          |
|               | Stepwise                          | $k_{\text{uni(TS_WD1)}}$ | 2.03E+10 | 2.18E+10 | 2.30E+10 | 2.33E+10 | 2.48E+10 | 2.63E+10 |
|               |                                   | $k_{\text{uni(WD)}}$     | 1.85E+10 | 2.01E+10 | 2.13E+10 | 2.16E+10 | 2.31E+10 | 2.46E+10 |
|               | $k_{\text{WD}_s}$                 | 2.40E-11                 | 1.64E-11 | 1.23E-11 | 1.15E-11 | 8.24E-12 | 6.06E-12 |          |
|               | $v_{\text{WD}_s}/v_{\text{WD}_o}$ | 5.98E+00                 | 5.25E+00 | 4.83E+00 | 4.91E+00 | 5.30E+00 | 5.69E+00 |          |
| One-step      | $K_{\text{eq(IM_WT1)}}$           | 1.15E-21                 | 6.81E-22 | 4.60E-22 | 4.19E-22 | 2.66E-22 | 1.73E-22 |          |
|               | $k_{\text{uni(TS_WT1)}}$          | 1.46E+11                 | 1.52E+11 | 1.57E+11 | 1.58E+11 | 1.64E+11 | 1.69E+11 |          |
|               | $k_{\text{WT}_o}$                 | 1.67E-10                 | 1.04E-10 | 7.22E-11 | 6.62E-11 | 4.35E-11 | 2.93E-11 |          |
| Channel<br>WT | $K_{\text{eq(IM_WT')}}$           | 8.81E-23                 | 6.75E-23 | 5.54E-23 | 5.28E-23 | 4.21E-23 | 3.41E-23 |          |
|               | $k_{\text{uni(TS_WT')}}$          | 4.58E+10                 | 4.90E+10 | 5.13E+10 | 5.31E+10 | 5.64E+10 | 6.06E+10 |          |
|               | Stepwise                          | $k_{\text{uni(TS_WT1)}}$ | 1.46E+11 | 1.52E+11 | 1.57E+11 | 1.58E+11 | 1.64E+11 | 1.69E+11 |
|               |                                   | $k_{\text{uni(WT)}}$     | 3.49E+10 | 3.70E+10 | 3.86E+10 | 3.98E+10 | 4.19E+10 | 4.46E+10 |
|               | $k_{\text{WT}_s}$                 | 3.07E-12                 | 2.50E-12 | 2.14E-12 | 2.10E-12 | 1.76E-12 | 1.52E-12 |          |
|               | $v_{\text{WT}_s}/v_{\text{WT}_o}$ | 9.52E+01                 | 1.07E+02 | 1.18E+02 | 1.22E+02 | 1.37E+02 | 1.54E+02 |          |
| Channel<br>AM | $K_{\text{eq(IM_AM1)}}$           | 1.58E-20                 | 8.35E-21 | 5.16E-21 | 4.60E-21 | 2.63E-21 | 1.56E-21 |          |
|               | $k_{\text{uni(TS_AM1)}}$          | 2.67E+10                 | 2.89E+10 | 3.06E+10 | 3.10E+10 | 3.32E+10 | 3.54E+10 |          |
|               | $k_{\text{AM}}$                   | 4.22E-10                 | 2.41E-10 | 1.58E-10 | 1.43E-10 | 8.74E-11 | 5.53E-11 |          |
| Channel<br>MA | $K_{\text{eq(IM_MA1)}}$           | 3.50E-21                 | 1.82E-21 | 1.11E-21 | 9.87E-22 | 5.58E-22 | 3.27E-22 |          |
|               | $k_{\text{uni(TS_MA1)}}$          | 4.68E+11                 | 4.76E+11 | 4.81E+11 | 4.82E+11 | 4.89E+11 | 4.95E+11 |          |
|               | $k_{\text{AM}}$                   | 1.64E-09                 | 8.66E-10 | 5.34E-10 | 4.76E-10 | 2.73E-10 | 1.62E-10 |          |
| One-step      | $K_{\text{eq(IM_FA1)}}$           | 2.52E-21                 | 1.26E-21 | 7.51E-22 | 6.62E-22 | 3.62E-22 | 2.06E-22 |          |
|               | $k_{\text{uni(TS_FA1)}}$          | 1.90E+11                 | 2.02E+11 | 2.10E+11 | 2.13E+11 | 2.24E+11 | 2.34E+11 |          |
|               | $k_{\text{FA}_o}$                 | 4.80E-10                 | 2.54E-10 | 1.58E-10 | 1.41E-10 | 8.10E-11 | 4.82E-11 |          |
| Channel<br>FA | $K_{\text{eq(IM_FA')}}$           | 1.44E-22                 | 1.15E-22 | 9.79E-23 | 9.41E-23 | 7.79E-23 | 6.54E-23 |          |
|               | $k_{\text{uni(TS_FA')}}$          | 1.01E+10                 | 1.08E+10 | 1.13E+10 | 1.14E+10 | 1.21E+10 | 1.27E+10 |          |
|               | Stepwise                          | $k_{\text{uni(TS_FA1)}}$ | 1.90E+11 | 2.02E+11 | 2.10E+11 | 2.13E+11 | 2.24E+11 | 2.34E+11 |
|               |                                   | $k_{\text{uni(FA)}}$     | 9.61E+09 | 1.02E+10 | 1.07E+10 | 1.08E+10 | 1.15E+10 | 1.21E+10 |
|               | $k_{\text{FA}_s}$                 | 1.39E-12                 | 1.18E-12 | 1.05E-12 | 1.02E-12 | 8.93E-13 | 7.90E-13 |          |

|                    |                    |                     |                    |          |          |          |          |          |          |
|--------------------|--------------------|---------------------|--------------------|----------|----------|----------|----------|----------|----------|
|                    |                    | $v_{FA_s}/v_{FA_o}$ | 1.43E+00           | 1.60E+00 | 1.88E+00 | 1.96E+00 | 2.37E+00 | 2.83E+00 |          |
| Channel            | One-step           | $K_{eq(IM\_SA1)}$   | 7.18E-21           | 3.41E-21 | 1.95E-21 | 1.71E-21 | 8.92E-22 | 4.86E-22 |          |
|                    |                    | $k_{uni(TS\_SA1)}$  | 6.74E+11           | 6.88E+11 | 6.98E+11 | 7.01E+11 | 7.13E+11 | 7.25E+11 |          |
|                    |                    | $k_{SA_o}$          | 4.84E-09           | 2.35E-09 | 1.36E-09 | 1.20E-09 | 6.36E-10 | 3.52E-10 |          |
|                    | SA                 | Stepwise            | $K_{eq(IM\_SA')}$  | 1.87E-22 | 1.41E-22 | 1.15E-22 | 1.09E-22 | 8.63E-23 | 6.92E-23 |
|                    |                    |                     | $k_{uni(TS\_SA')}$ | 1.05E+10 | 1.11E+10 | 1.15E+10 | 1.16E+10 | 1.22E+10 | 1.27E+10 |
|                    |                    |                     | $k_{uni(TS\_SA1)}$ | 6.74E+11 | 6.88E+11 | 6.98E+11 | 7.01E+11 | 7.13E+11 | 7.25E+11 |
|                    |                    | $k_{uni(SA)}$       | 1.03E+10           | 1.09E+10 | 1.14E+10 | 1.15E+10 | 1.20E+10 | 1.26E+10 |          |
|                    |                    | $k_{SA_s}$          | 1.93E-12           | 1.54E-12 | 1.31E-12 | 1.25E-12 | 1.04E-12 | 8.69E-13 |          |
|                    |                    | $v_{SA_s}/v_{SA_o}$ | 9.49E+00           | 1.02E+01 | 1.09E+01 | 1.09E+01 | 1.18E+01 | 1.26E+01 |          |
|                    | Channel            | One-step            | $K_{eq(IM\_SW1)}$  | 6.31E-20 | 2.70E-20 | 1.42E-20 | 1.22E-20 | 5.79E-21 | 2.88E-21 |
| $k_{uni(TS\_SW1)}$ |                    |                     | 1.30E+11           | 1.36E+11 | 1.40E+11 | 1.41E+11 | 1.46E+11 | 1.51E+11 |          |
| $k_{SW_o}$         |                    |                     | 8.20E-09           | 3.66E-09 | 1.99E-09 | 1.72E-09 | 8.48E-10 | 4.36E-10 |          |
| SW                 |                    | Stepwise            | $K_{eq(IM\_SW')}$  | 3.82E-22 | 2.95E-22 | 2.44E-22 | 2.33E-22 | 1.87E-22 | 1.52E-22 |
|                    |                    |                     | $k_{uni(TS\_SW')}$ | 6.04E+10 | 6.50E+10 | 6.87E+10 | 6.96E+10 | 7.42E+10 | 7.87E+10 |
|                    |                    |                     | $k_{uni(TS\_SW1)}$ | 1.30E+11 | 1.36E+11 | 1.40E+11 | 1.41E+11 | 1.47E+11 | 1.52E+11 |
|                    |                    | $k_{uni(SW)}$       | 4.12E+10           | 4.40E+10 | 4.61E+10 | 4.66E+10 | 4.93E+10 | 5.18E+10 |          |
|                    |                    | $k_{SW_s}$          | 1.58E-11           | 1.30E-11 | 1.12E-11 | 1.08E-11 | 9.19E-12 | 7.89E-12 |          |
|                    |                    | $v_{SW_s}/v_{SW_o}$ | 1.54E+04           | 1.34E+04 | 1.21E+04 | 1.20E+04 | 1.05E+04 | 9.57E+03 |          |
| Channel            |                    | One-step            | $K_{eq(IM\_SD1)}$  | 4.40E-21 | 2.06E-21 | 1.16E-21 | 1.01E-21 | 5.20E-22 | 2.79E-22 |
|                    | $k_{uni(TS\_SD1)}$ |                     | 9.83E+11           | 1.01E+12 | 1.03E+12 | 1.03E+12 | 1.05E+12 | 1.07E+12 |          |
|                    | $k_{SD_o}$         |                     | 4.33E-09           | 2.07E-09 | 1.19E-09 | 1.04E-09 | 5.47E-10 | 2.99E-10 |          |
|                    | SD                 | Stepwise            | $K_{eq(IM\_SD')}$  | 1.34E-23 | 9.67E-24 | 7.59E-24 | 7.16E-24 | 5.42E-24 | 4.19E-24 |
|                    |                    |                     | $k_{uni(TS\_SD')}$ | 3.06E+11 | 3.36E+11 | 3.60E+11 | 3.66E+11 | 3.98E+11 | 4.29E+11 |
|                    |                    |                     | $k_{uni(TS\_SD1)}$ | 9.84E+11 | 1.01E+12 | 1.03E+12 | 1.03E+12 | 1.05E+12 | 1.08E+12 |
|                    |                    | $k_{uni(SD)}$       | 2.34E+11           | 2.52E+11 | 2.67E+11 | 2.70E+11 | 2.89E+11 | 3.07E+11 |          |
|                    |                    | $k_{SD_s}$          | 3.12E-12           | 2.44E-12 | 2.02E-12 | 1.94E-12 | 1.57E-12 | 1.29E-12 |          |
|                    |                    | $v_{SD_s}/v_{SD_o}$ | 9.51E+01           | 9.72E+01 | 9.83E+01 | 9.90E+01 | 1.01E+02 | 1.03E+02 |          |

For the stepwise route, the unimolecular rate constants ( $k_{uni}$ ) have been calculated according to

the RRKM model described as  $\frac{1}{k_{uni(WD)}} = \frac{1}{k_{uni(TS\_WD')}} + \frac{1}{k_{uni(TS\_WD1)}}$ ,  $\frac{1}{k_{uni(WT)}} = \frac{1}{k_{uni(TS\_WT')}} + \frac{1}{k_{uni(TS\_WT1)}}$ ,  
 $\frac{1}{k_{uni(FA)}} = \frac{1}{k_{uni(TS\_FA')}} + \frac{1}{k_{uni(TS\_FA1)}}$ ,  $\frac{1}{k_{uni(SA)}} = \frac{1}{k_{uni(TS\_SA')}} + \frac{1}{k_{uni(TS\_SA1)}}$ ,  $\frac{1}{k_{uni(SW)}} = \frac{1}{k_{uni(TS\_SW')}} + \frac{1}{k_{uni(TS\_SW1)}}$  and  
 $\frac{1}{k_{uni(SD)}} = \frac{1}{k_{uni(TS\_SD')}} + \frac{1}{k_{uni(TS\_SD1)}}$ ;  $v_s/v_o$  is the rate ratio between stepwise route and the corresponding

one-step process in the hydrolysis reaction of  $HNSO_2$  with  $(H_2O)_2$ ,  $(H_2O)_3$ ,  $HCOOH$ ,  $H_2SO_4$ ,  $H_2SO_4 \cdots H_2O$  and  $(H_2SO_4)_2$ .

To check whether stepwise routes are favorable than the corresponding one-step process or not

in hydrolysis of HNSO<sub>2</sub> reaction with (H<sub>2</sub>O)<sub>2</sub>, (H<sub>2</sub>O)<sub>3</sub>, HCOOH, H<sub>2</sub>SO<sub>4</sub>, H<sub>2</sub>SO<sub>4</sub>···H<sub>2</sub>O and (H<sub>2</sub>SO<sub>4</sub>)<sub>2</sub>, it is necessary to calculate the rate ratio ( $v_s/v_o$ ) between stepwise route and the corresponding one-step process. The corresponding rate ratio ( $v_s/v_o$ ) of the hydrolysis of HNSO<sub>2</sub> in the presence of (H<sub>2</sub>O)<sub>2</sub>, (H<sub>2</sub>O)<sub>3</sub>, HCOOH, H<sub>2</sub>SO<sub>4</sub>, H<sub>2</sub>SO<sub>4</sub>···H<sub>2</sub>O and (H<sub>2</sub>SO<sub>4</sub>)<sub>2</sub> can be respectively expressed in Eq. (S1) to Eq. (S6):

$$\frac{v_{WD\_s}}{v_{WD\_o}} = \frac{K_{eq(H_2O)_3} \times k_{WD\_s} \times [HNSO_2] \times [H_2O] \times [(H_2O)_2]}{K_{eq(HNSO_2 \cdots H_2O)} \times k_{WD\_o} \times [HNSO_2] \times [H_2O] \times [(H_2O)_2]} = \frac{K_{eq(H_2O)_3} \times k_{WD\_s}}{K_{eq(HNSO_2 \cdots H_2O)} \times k_{WD\_o}} \quad (S1)$$

$$\frac{v_{WT\_s}}{v_{WT\_o}} = \frac{K_{eq(H_2O)_4} \times k_{WT\_s} \times [HNSO_2] \times [(H_2O)_2] \times [(H_2O)_2]}{K_{eq(HNSO_2 \cdots (H_2O)_2)} \times k_{WT\_o} \times [HNSO_2] \times [(H_2O)_2] \times [(H_2O)_2]} = \frac{K_{eq(H_2O)_4} \times k_{WT\_s}}{K_{eq(HNSO_2 \cdots (H_2O)_2)} \times k_{WT\_o}} \quad (S2)$$

$$\frac{v_{FA\_s}}{v_{FA\_o}} = \frac{K_{eq(HCOOH \cdots H_2O)} \times k_{FA\_s} \times [HNSO_2] \times [H_2O] \times [HCOOH]}{K_{eq(HNSO_2 \cdots H_2O)} \times k_{FA\_o} \times [HNSO_2] \times [H_2O] \times [HCOOH]} = \frac{K_{eq(HCOOH \cdots H_2O)} \times k_{FA\_s}}{K_{eq(HNSO_2 \cdots H_2O)} \times k_{FA\_o}} \quad (S3)$$

$$\frac{v_{SA\_s}}{v_{SA\_o}} = \frac{K_{eq(H_2SO_4 \cdots H_2O)} \times k_{SA\_s} \times [HNSO_2] \times [H_2O] \times [H_2SO_4]}{K_{eq(HNSO_2 \cdots H_2O)} \times k_{SA\_o} \times [HNSO_2] \times [H_2O] \times [H_2SO_4]} = \frac{K_{eq(H_2SO_4 \cdots H_2O)} \times k_{SA\_s}}{K_{eq(HNSO_2 \cdots H_2O)} \times k_{SA\_o}} \quad (S4)$$

$$\frac{v_{SW\_s}}{v_{SW\_o}} = \frac{K_{eq(H_2SO_4 \cdots (H_2O)_2)} \times k_{SW\_s} \times [HNSO_2] \times [H_2O] \times [H_2SO_4 \cdots H_2O]}{K_{eq(HNSO_2 \cdots H_2O)} \times k_{SW\_o} \times [HNSO_2] \times [H_2O] \times [H_2SO_4 \cdots H_2O]} = \frac{K_{eq(H_2SO_4 \cdots (H_2O)_2)} \times k_{SW\_s}}{K_{eq(HNSO_2 \cdots H_2O)} \times k_{SW\_o}} \quad (S5)$$

$$\frac{v_{SD\_s}}{v_{SD\_o}} = \frac{K_{eq((H_2SO_4)_2 \cdots H_2O)} \times k_{SD\_s} \times [HNSO_2] \times [H_2O] \times [(H_2SO_4)_2]}{K_{eq(HNSO_2 \cdots H_2O)} \times k_{SD\_o} \times [HNSO_2] \times [H_2O] \times [(H_2SO_4)_2]} = \frac{K_{eq((H_2SO_4)_2 \cdots H_2O)} \times k_{SD\_s}}{K_{eq(HNSO_2 \cdots H_2O)} \times k_{SD\_o}} \quad (S6)$$

In Eq. (S1) to Eq. (S6),  $K_{eq(HNSO_2 \cdots H_2O)}$ ,  $K_{eq((H_2O)_3)}$ ,  $K_{eq((H_2O)_4)}$ ,  $K_{eq(HNSO_2 \cdots (H_2O)_2)}$ ,  $K_{eq(HCOOH \cdots H_2O)}$ ,  $K_{eq(H_2SO_4 \cdots H_2O)}$ ,  $K_{eq(H_2SO_4 \cdots (H_2O)_2)}$  and  $K_{eq((H_2SO_4)_2 \cdots H_2O)}$  are respectively the equilibrium constant for the formation of HNSO<sub>2</sub>···H<sub>2</sub>O, (H<sub>2</sub>O)<sub>3</sub>, (H<sub>2</sub>O)<sub>4</sub>, HNSO<sub>2</sub>···(H<sub>2</sub>O)<sub>2</sub>, HCOOH···H<sub>2</sub>O, H<sub>2</sub>SO<sub>4</sub>···H<sub>2</sub>O, H<sub>2</sub>SO<sub>4</sub>···(H<sub>2</sub>O)<sub>2</sub> and (H<sub>2</sub>SO<sub>4</sub>)<sub>2</sub>···H<sub>2</sub>O.  $k_{WD\_s}$ ,  $k_{WT\_s}$ ,  $k_{FA\_s}$ ,  $k_{SA\_s}$ ,  $k_{SW\_s}$  and  $k_{SD\_s}$  in Eq. (S1) to Eq. (S6) are respectively the bimolecular rate coefficients for the stepwise routes of the hydrolysis reaction of HNSO<sub>2</sub> with (H<sub>2</sub>O)<sub>2</sub>, (H<sub>2</sub>O)<sub>3</sub>, HCOOH, H<sub>2</sub>SO<sub>4</sub>, H<sub>2</sub>SO<sub>4</sub>···H<sub>2</sub>O and (H<sub>2</sub>SO<sub>4</sub>)<sub>2</sub>.  $k_{WD\_o}$ ,  $k_{WT\_o}$ ,  $k_{FA\_o}$ ,  $k_{SA\_o}$ ,  $k_{SW\_o}$  and  $k_{SD\_o}$  in Eq. (S1) to Eq. (S6) are respectively the bimolecular rate constant for the corresponding one-step process of the hydrolysis reaction of HNSO<sub>2</sub> with (H<sub>2</sub>O)<sub>2</sub>, (H<sub>2</sub>O)<sub>3</sub>, HCOOH, H<sub>2</sub>SO<sub>4</sub>, H<sub>2</sub>SO<sub>4</sub>···H<sub>2</sub>O and (H<sub>2</sub>SO<sub>4</sub>)<sub>2</sub>.  $v_{WD\_s}/v_{WD\_o}$ ,  $v_{WT\_s}/v_{WT\_o}$ ,  $v_{FA\_s}/v_{FA\_o}$ ,  $v_{SA\_s}/v_{SA\_o}$ ,  $v_{SW\_s}/v_{SW\_o}$  and  $v_{SD\_s}/v_{SD\_o}$  are respectively the corresponding rate ratio ( $v_s/v_o$ ) between the stepwise route and one-step process involved in the hydrolysis of HNSO<sub>2</sub> with (H<sub>2</sub>O)<sub>2</sub>, (H<sub>2</sub>O)<sub>3</sub>, HCOOH, H<sub>2</sub>SO<sub>4</sub>, H<sub>2</sub>SO<sub>4</sub>···H<sub>2</sub>O and (H<sub>2</sub>SO<sub>4</sub>)<sub>2</sub>. It can be seen in Table S5 that the calculated rate ratio ( $v_s/v_o$ ) for the hydrolysis of HNSO<sub>2</sub> with (H<sub>2</sub>O)<sub>2</sub>, (H<sub>2</sub>O)<sub>3</sub>, HCOOH, H<sub>2</sub>SO<sub>4</sub>, H<sub>2</sub>SO<sub>4</sub>···H<sub>2</sub>O and (H<sub>2</sub>SO<sub>4</sub>)<sub>2</sub> are

respectively  $5.98 \times 10^0$ - $4.83 \times 10^0$ ,  $9.52 \times 10^1$ - $1.54 \times 10^2$ ,  $1.43 \times 10^0$ - $2.83 \times 10^0$ ,  $9.49 \times 10^0$ - $1.26 \times 10^1$ ,  $9.57 \times 10^3$ - $1.54 \times 10^4$  and  $9.51 \times 10^1$ - $1.03 \times 10^2$  within the temperature range of 280-320 K. This reveals that stepwise routes in Channels WD, WT, FA, SA, SW and SD are more favorable than the corresponding one-step processes.

**Table S6** Pseudo-first-order rate constants ( $k'$ ) in  $\text{s}^{-1}$  for the favorable routes in the hydrolysis reaction of  $\text{HNSO}_2$  with catalyst  $X$  within the temperature range of 280-320 K

| Reaction                   |                      | $T$ (K)            | 280      | 290      | 298      | 300      | 310      | 320      |
|----------------------------|----------------------|--------------------|----------|----------|----------|----------|----------|----------|
| Channel<br>WM              | 20% RH               | $k'_{\text{WM}}$   | 3.78E-20 | 4.47E-20 | 4.97E-20 | 5.24E-20 | 6.04E-20 | 6.78E-20 |
|                            | 40% RH               |                    | 7.55E-20 | 8.89E-20 | 1.03E-19 | 1.05E-19 | 1.21E-19 | 1.36E-19 |
|                            | 60% RH               |                    | 1.14E-19 | 1.34E-19 | 1.49E-19 | 1.57E-19 | 1.81E-19 | 2.03E-19 |
|                            | 80% RH               |                    | 1.52E-19 | 1.78E-19 | 2.06E-19 | 2.09E-19 | 2.42E-19 | 2.71E-19 |
|                            | 100% RH              |                    | 1.89E-19 | 2.23E-19 | 2.55E-19 | 2.62E-19 | 3.02E-19 | 3.39E-19 |
| Channel<br>WD <sub>s</sub> | 20% RH               | $k'_{\text{WD}_s}$ | 4.50E-18 | 5.52E-18 | 6.23E-18 | 6.80E-18 | 7.99E-18 | 9.00E-18 |
|                            | 40% RH               |                    | 1.79E-17 | 2.19E-17 | 2.66E-17 | 2.71E-17 | 3.19E-17 | 3.60E-17 |
|                            | 60% RH               |                    | 4.06E-17 | 4.94E-17 | 5.61E-17 | 6.10E-17 | 7.20E-17 | 8.10E-17 |
|                            | 80% RH               |                    | 7.25E-17 | 8.75E-17 | 1.06E-16 | 1.08E-16 | 1.28E-16 | 1.44E-16 |
|                            | 100% RH              |                    | 1.13E-16 | 1.37E-16 | 1.64E-16 | 1.69E-16 | 2.00E-16 | 2.25E-16 |
| Channel<br>WT <sub>s</sub> | 20% RH               | $k'_{\text{WT}_s}$ | 1.99E-19 | 2.73E-19 | 3.30E-19 | 3.82E-19 | 4.93E-19 | 6.03E-19 |
|                            | 40% RH               |                    | 1.58E-18 | 2.15E-18 | 2.91E-18 | 3.03E-18 | 3.94E-18 | 4.82E-18 |
|                            | 60% RH               |                    | 5.38E-18 | 7.30E-18 | 8.91E-18 | 1.03E-17 | 1.33E-17 | 1.63E-17 |
|                            | 80% RH               |                    | 1.28E-17 | 1.72E-17 | 2.33E-17 | 2.43E-17 | 3.17E-17 | 3.86E-17 |
|                            | 100% RH              |                    | 2.48E-17 | 3.37E-17 | 4.46E-17 | 4.75E-17 | 6.16E-17 | 7.54E-17 |
| Channel<br>AM              | 0.1 ppbv             | $k'_{\text{AM}}$   | 1.23E-22 | 5.33E-23 | 2.84E-23 | 2.44E-23 | 1.18E-23 | 5.98E-24 |
|                            | 10 ppbv              |                    | 1.23E-20 | 5.33E-21 | 2.84E-21 | 2.44E-21 | 1.18E-21 | 5.98E-22 |
|                            | 2900 ppbv            |                    | 3.58E-18 | 1.54E-18 | 8.21E-19 | 7.10E-19 | 3.45E-19 | 1.75E-19 |
| Channel<br>MA              | 80 ppbv              | $k'_{\text{MA}}$   | 2.27E-21 | 8.92E-22 | 4.39E-22 | 3.71E-22 | 1.65E-22 | 7.71E-23 |
|                            | 180 ppbv             |                    | 5.10E-21 | 2.00E-21 | 9.86E-22 | 8.33E-22 | 3.71E-22 | 1.73E-22 |
| Channel<br>FA <sub>s</sub> | 0.01 ppbv            | $k'_{\text{FA}_s}$ | 1.81E-23 | 9.02E-24 | 5.36E-24 | 4.72E-24 | 2.59E-24 | 1.48E-24 |
|                            | 2 ppbv               |                    | 1.38E-21 | 6.78E-22 | 4.14E-22 | 3.67E-22 | 1.97E-22 | 1.16E-22 |
|                            | 10 ppbv              |                    | 1.81E-20 | 9.02E-21 | 5.36E-21 | 4.72E-21 | 2.59E-21 | 1.48E-21 |
| Channel<br>SA <sub>s</sub> | [SA]=10 <sup>8</sup> | $k'_{\text{SA}_s}$ | 1.99E-21 | 7.96E-22 | 4.02E-22 | 3.31E-22 | 1.50E-22 | 7.12E-23 |
|                            | [SA]=10 <sup>6</sup> |                    | 1.99E-23 | 7.96E-24 | 4.02E-24 | 3.31E-24 | 1.50E-24 | 7.12E-25 |
|                            | [SA]=10 <sup>4</sup> |                    | 1.99E-25 | 7.96E-26 | 4.02E-26 | 3.31E-26 | 1.50E-26 | 7.12E-27 |
| Channel<br>SW <sub>s</sub> | [SA]=10 <sup>8</sup> | 100%RH             | 2.20E-19 | 5.14E-20 | 2.05E-20 | 1.65E-20 | 5.72E-21 | 2.16E-21 |
|                            |                      | 20%RH              | 4.39E-20 | 1.03E-20 | 4.00E-21 | 3.31E-21 | 1.14E-21 | 4.32E-22 |
|                            | [SA]=10 <sup>6</sup> | 100%RH             | 2.20E-21 | 5.14E-22 | 2.05E-22 | 1.65E-22 | 5.72E-23 | 2.16E-23 |
|                            |                      | 20%RH              | 4.39E-22 | 1.03E-22 | 4.00E-23 | 3.31E-23 | 1.14E-23 | 4.32E-24 |
|                            | [SA]=10 <sup>4</sup> | 100%RH             | 2.20E-23 | 5.14E-24 | 2.05E-24 | 1.65E-24 | 5.72E-25 | 2.16E-25 |
|                            |                      | 20%RH              | 4.39E-24 | 1.03E-24 | 4.00E-25 | 3.31E-25 | 1.14E-25 | 4.32E-26 |
| Channel<br>SD <sub>s</sub> | [SA]=10 <sup>8</sup> | $k'_{\text{SD}_s}$ | 4.56E-26 | 1.19E-26 | 2.36E-27 | 1.52E-27 | 2.36E-28 | 4.09E-29 |
|                            | [SA]=10 <sup>6</sup> |                    | 4.56E-30 | 1.19E-30 | 2.36E-31 | 1.52E-31 | 2.36E-32 | 4.09E-33 |
|                            | [SA]=10 <sup>4</sup> |                    | 4.56E-28 | 1.19E-28 | 2.36E-29 | 1.52E-29 | 2.36E-30 | 4.09E-31 |

$k'_{\text{WD}_s}$ ,  $k'_{\text{WT}_s}$ ,  $k'_{\text{FA}_s}$ ,  $k'_{\text{SA}_s}$ ,  $k'_{\text{SW}_s}$  and  $k'_{\text{SD}_s}$  are respectively the pseudo-first-order rate constants ( $k'$ ) for the stepwise routes in the hydrolysis reaction of  $\text{HNSO}_2$  with  $(\text{H}_2\text{O})_2$ ,  $(\text{H}_2\text{O})_3$ ,  $\text{HCOOH}$ ,  $\text{H}_2\text{SO}_4$ ,  $\text{H}_2\text{SO}_4 \cdots \text{H}_2\text{O}$  and  $(\text{H}_2\text{SO}_4)_2$ .

**Table S7** Equilibrium constants ( $\text{cm}^3 \cdot \text{molecule}^{-1}$ ), concentrations ( $\text{molecules} \cdot \text{cm}^{-3}$ ) of catalysts, and rate coefficient ( $\text{cm}^3 \cdot \text{molecules}^{-1} \cdot \text{s}^{-1}$ ) involved in the hydrolysis reaction of  $\text{HNSO}_2$  with catalysts of  $(\text{H}_2\text{O})_2$ ,  $(\text{H}_2\text{O})_3$ ,  $\text{NH}_3$ ,  $\text{HCOOH}$  and  $\text{H}_2\text{SO}_4 \cdots \text{H}_2\text{O}$  at different altitudes in troposphere

| Altitude | T(K)  | P(atm) | $K_{\text{eq}((\text{H}_2\text{O})_3)}$                              | $[(\text{H}_2\text{O})_2]$                          | $k_{\text{WD}_s}$ | $K_{\text{eq}((\text{H}_2\text{O})_4)}$                 | $[(\text{H}_2\text{O})_3]$ | $k_{\text{WT}_s}$ |
|----------|-------|--------|----------------------------------------------------------------------|-----------------------------------------------------|-------------------|---------------------------------------------------------|----------------------------|-------------------|
| 5 km     | 259.3 | 0.535  | 6.32E-20                                                             | 2.70E+12                                            | 5.91E-11          | 3.40E-19                                                | 2.32E+10                   | 4.84E-12          |
| 10 km    | 229.7 | 0.266  | 4.52E-19                                                             | 2.30E+11                                            | 2.73E-10          | 2.87E-18                                                | 3.25E+09                   | 1.06E-11          |
| 15 km    | 212.6 | 0.120  | 1.85E-18                                                             | 6.30E+06                                            | 8.19E-10          | 1.32E-17                                                | 1.52E+03                   | 1.86E-11          |
| Altitude | T(K)  | P(atm) | $K_{\text{eq}(\text{HNSO}_2 \cdots \text{H}_2\text{O})}$             | $[\text{NH}_3]$                                     | $k_{\text{AM}}$   | $K_{\text{eq}(\text{HCOOH} \cdots \text{H}_2\text{O})}$ | $[\text{HCOOH}]$           | $k_{\text{FA}_s}$ |
| 5 km     | 259.3 | 0.535  | 1.99E-22                                                             | 7.60E+09                                            | 7.38E-10          | 9.21E-20                                                | 2.00E+10                   | 1.15E-11          |
| 10 km    | 229.7 | 0.266  | 5.41E-22                                                             | 8.50E+08                                            | 8.19E-10          | 6.55E-19                                                | 8.30E+09                   | 2.33E-11          |
| 15 km    | 212.6 | 0.120  | 1.12E-21                                                             | 1.20E+08                                            | 5.57E-10          | 2.68E-18                                                | 3.20E+09                   | 3.94E-11          |
| Altitude | T(K)  | P(atm) | $K_{\text{eq}(\text{H}_2\text{SO}_4 \cdots (\text{H}_2\text{O})_2)}$ | $[\text{H}_2\text{SO}_4 \cdots \text{H}_2\text{O}]$ | $k_{\text{SW}_s}$ |                                                         |                            |                   |
| 5 km     | 259.3 | 0.535  | 8.15E-18                                                             | 1.82E+07                                            | 2.52E-11          |                                                         |                            |                   |
| 10 km    | 229.7 | 0.266  | 1.04E-16                                                             | 7.23E+06                                            | 5.68E-11          |                                                         |                            |                   |
| 15 km    | 212.6 | 0.120  | 6.38E-16                                                             | 5.65E+03                                            | 1.03E-10          |                                                         |                            |                   |

$K_{\text{eq}((\text{H}_2\text{O})_3)}$ ,  $K_{\text{eq}((\text{H}_2\text{O})_4)}$ ,  $K_{\text{eq}(\text{HNSO}_2 \cdots \text{H}_2\text{O})}$ ,  $K_{\text{eq}(\text{HCOOH} \cdots \text{H}_2\text{O})}$ , and  $K_{\text{eq}(\text{H}_2\text{SO}_4 \cdots (\text{H}_2\text{O})_2)}$  are the equilibrium constants for the formation of  $(\text{H}_2\text{O})_3$ ,  $(\text{H}_2\text{O})_4$ ,  $\text{HNSO}_2 \cdots \text{H}_2\text{O}$ ,  $\text{HCOOH} \cdots \text{H}_2\text{O}$  and  $\text{H}_2\text{SO}_4 \cdots (\text{H}_2\text{O})_2$ , respectively.  $[(\text{H}_2\text{O})_2]$ ,  $[(\text{H}_2\text{O})_3]$ ,  $[\text{NH}_3]$ ,  $[\text{HCOOH}]$  and  $[\text{H}_2\text{SO}_4 \cdots \text{H}_2\text{O}]$  are the concentrations of  $(\text{H}_2\text{O})_2$ ,  $(\text{H}_2\text{O})_3$ ,  $\text{HCOOH}$  and  $\text{H}_2\text{SO}_4 \cdots \text{H}_2\text{O}$ , respectively.  $k_{\text{WD}_s}$ ,  $k_{\text{WT}_s}$ ,  $k_{\text{AM}}$ ,  $k_{\text{FA}_s}$  and  $k_{\text{SW}_s}$  are the bimolecular rate coefficient for the favorable routes in the hydrolysis of  $\text{HNSO}_2$  with  $(\text{H}_2\text{O})_2$ ,  $(\text{H}_2\text{O})_3$ ,  $\text{NH}_3$ ,  $\text{HCOOH}$  and  $\text{H}_2\text{SO}_4 \cdots \text{H}_2\text{O}$ , respectively.

Previous reports have shown that atmospheric species concentrations various with increasing altitude. The available concentrations of  $(\text{H}_2\text{O})_2$  at 5, 10 and 15 km altitudes were respectively known to  $2.70 \times 10^{12}$ ,  $2.30 \times 10^{11}$  and  $6.30 \times 10^6$   $\text{molecules} \cdot \text{cm}^{-3}$ , whereas the concentration of  $(\text{H}_2\text{O})_3$  at the same altitudes were  $2.32 \times 10^{10}$ ,  $3.25 \times 10^9$  and  $1.52 \times 10^3$   $\text{molecules} \cdot \text{cm}^{-3}$ . Besides,  $\text{NH}_3$  concentration has considered the highest mixing ratios of 5, 10 and 15 km altitudes, the values were respectively  $7.6 \times 10^9$ ,  $8.5 \times 10^8$  and  $1.2 \times 10^8$   $\text{molecules} \cdot \text{cm}^{-3}$ . Similarly, within the altitudes range of 5-15 km,  $\text{HCOOH}$  was found at  $2.00 \times 10^{10}$ ,  $8.30 \times 10^9$  and  $3.20 \times 10^9$   $\text{molecules} \cdot \text{cm}^{-3}$ . Using the reported concentrations of  $\text{H}_2\text{O}$  and  $\text{H}_2\text{SO}_4$  along with the equilibrium constants for formation of  $\text{H}_2\text{SO}_4 \cdots \text{H}_2\text{O}$ , the concentrations of  $\text{H}_2\text{SO}_4 \cdots \text{H}_2\text{O}$  at 5, 10, and 15 km altitudes shown in Table S7 were calculated to be  $1.82 \times 10^7$ ,  $7.23 \times 10^6$  and  $5.65 \times 10^3$   $\text{molecules} \cdot \text{cm}^{-3}$ , respectively.



**Table S8** Coordinates stationary points for the hydrolysis reaction of HNSO<sub>2</sub> without and with catalyst *X* at the M06-2X/6-311+G(2df,2pd) level of theory

|                                     |             |             |             |                                                      |             |             |             |
|-------------------------------------|-------------|-------------|-------------|------------------------------------------------------|-------------|-------------|-------------|
|                                     |             |             |             | <b>HNSO<sub>2</sub></b>                              |             |             |             |
| <b>H<sub>2</sub>O</b>               |             |             |             | S                                                    | 0.02668400  | -0.00171700 | -0.00001100 |
| O                                   | 0.00000000  | 0.00000000  | 0.11649900  | O                                                    | 1.09556900  | -0.93859100 | 0.00000200  |
| H                                   | 0.00000000  | 0.76129500  | -0.46599700 | O                                                    | 0.30048000  | 1.40011400  | 0.00001100  |
| H                                   | 0.00000000  | -0.76129500 | -0.46599700 | N                                                    | -1.36507300 | -0.55342000 | 0.00002300  |
|                                     |             |             |             | H                                                    | -2.03982900 | 0.20922800  | -0.00008900 |
| <b>(H<sub>2</sub>O)<sub>2</sub></b> |             |             |             | <b>NH<sub>3</sub></b>                                |             |             |             |
| O                                   | 1.50569100  | -0.00009600 | -0.12131200 | N                                                    | 0.00000000  | 0.00000000  | 0.11194200  |
| H                                   | 1.93076400  | 0.00059800  | 0.73673000  | H                                                    | 0.00000000  | 0.94034000  | -0.26119900 |
| H                                   | 0.55803900  | 0.00008800  | 0.06152900  | H                                                    | -0.81435800 | -0.47017000 | -0.26119900 |
| O                                   | -1.38593700 | 0.00008100  | 0.11160400  | H                                                    | 0.81435800  | -0.47017000 | -0.26119900 |
| H                                   | -1.72349600 | 0.76397800  | -0.36083000 |                                                      |             |             |             |
| H                                   | -1.72334100 | -0.76454300 | -0.35976300 |                                                      |             |             |             |
| <b>CH<sub>3</sub>NH<sub>2</sub></b> |             |             |             | <b>NH<sub>3</sub>···H<sub>2</sub>O</b>               |             |             |             |
| N                                   | -0.74729300 | 0.00000200  | -0.12044700 | N                                                    | 1.37891100  | 0.02294000  | -0.00004000 |
| H                                   | -1.15029600 | -0.81204300 | 0.32716200  | H                                                    | 1.57739400  | -0.95680000 | 0.16129600  |
| H                                   | -1.15029800 | 0.81204300  | 0.32717400  | H                                                    | 1.85294100  | 0.54844600  | 0.72331000  |
| C                                   | 0.70594000  | 0.00000100  | 0.01769600  | H                                                    | 1.80151900  | 0.27356200  | -0.88473400 |
| H                                   | 1.11270000  | -0.87684700 | -0.48363600 | O                                                    | -1.54449200 | -0.10468200 | 0.00008500  |
| H                                   | 1.11273700  | 0.87670500  | -0.48387100 | H                                                    | -1.94306300 | 0.76568100  | -0.00034500 |
| H                                   | 1.07056900  | 0.00012300  | 1.05012000  | H                                                    | -0.58523000 | 0.04599200  | 0.00007100  |
| <b>(H<sub>2</sub>O)<sub>3</sub></b> |             |             |             | <b>CH<sub>3</sub>NH<sub>2</sub>···H<sub>2</sub>O</b> |             |             |             |
| O                                   | -1.25089000 | -1.00492400 | -0.08799700 | N                                                    | -0.78569800 | -0.75244000 | -0.00001100 |
| H                                   | -1.22161500 | -0.03734600 | -0.01017700 | H                                                    | -1.14243200 | -1.23642200 | 0.81340400  |
| O                                   | -0.24942000 | 1.58467300  | 0.10860000  | H                                                    | -1.14297700 | -1.23658200 | -0.81309100 |
| H                                   | 0.57945100  | 1.08120700  | 0.06108700  | C                                                    | -1.21125500 | 0.65103300  | -0.00000900 |
| O                                   | 1.50506700  | -0.57081700 | -0.08165000 | H                                                    | -0.79295100 | 1.14424800  | 0.87510100  |
| H                                   | 0.66496900  | -1.05559600 | -0.05303700 | H                                                    | -0.79393300 | 1.14394600  | -0.87575700 |
| H                                   | -1.92418000 | -1.30794500 | 0.52199900  | H                                                    | -2.29488300 | 0.78928800  | 0.00056100  |
| H                                   | -0.21325000 | 2.22741900  | -0.60112200 | O                                                    | 1.90412500  | 0.19150900  | 0.00005000  |
| H                                   | 2.07657400  | -0.97920100 | 0.56962600  | H                                                    | 1.08225800  | -0.33083200 | -0.00013500 |
|                                     |             |             |             | H                                                    | 2.61933300  | -0.44484000 | -0.00035400 |
| <b>HCOOH</b>                        |             |             |             | <b>HCOOH···H<sub>2</sub>O</b>                        |             |             |             |
| C                                   | -0.13522200 | 0.39793800  | -0.00003200 | C                                                    | 1.19839900  | -0.04039600 | -0.00665800 |
| H                                   | -0.11135800 | 1.49276800  | -0.00007700 | H                                                    | 2.28553200  | 0.09174000  | -0.00943900 |
| O                                   | 1.11006500  | -0.08857900 | 0.00012000  | O                                                    | 0.57785300  | 1.12411100  | -0.00750800 |
| O                                   | -1.12630400 | -0.26471500 | -0.00010800 | O                                                    | 0.66615500  | -1.11987900 | -0.00409900 |
| H                                   | 1.05259500  | -1.05404500 | 0.00017500  | H                                                    | -0.39345200 | 0.96661100  | -0.00327300 |
|                                     |             |             |             | O                                                    | -1.88444300 | 0.00399200  | 0.08362500  |
|                                     |             |             |             | H                                                    | -1.35133000 | -0.80116700 | 0.01618400  |
|                                     |             |             |             | H                                                    | -2.60766900 | -0.08060200 | -0.53966500 |

|   |                                                  |             |                                                                              |             |             |             |
|---|--------------------------------------------------|-------------|------------------------------------------------------------------------------|-------------|-------------|-------------|
|   |                                                  |             | <b><i>trans</i>-H<sub>2</sub>SO<sub>4</sub>···H<sub>2</sub>O</b>             |             |             |             |
|   | <b><i>trans</i>-H<sub>2</sub>SO<sub>4</sub></b>  |             | S                                                                            | -0.57805100 | -0.09385500 | 0.10579100  |
| S | -0.00000200                                      | 0.00004200  | O                                                                            | -0.91547600 | 1.39868600  | -0.31193300 |
| O | -1.02361600                                      | -0.67898100 | O                                                                            | 0.33458500  | -0.57611800 | -1.05461000 |
| O | 1.02364600                                       | 0.67853700  | O                                                                            | 0.20499100  | 0.02533900  | 1.29568400  |
| O | 0.65945300                                       | -1.06393300 | O                                                                            | -1.78038400 | -0.84768500 | 0.06286100  |
| O | -0.65948000                                      | 1.06436600  | H                                                                            | -1.67611700 | 1.39465400  | -0.90731700 |
| H | -1.69533400                                      | -0.03319500 | H                                                                            | 1.28939700  | -0.37045800 | -0.82912900 |
| H | 1.69535400                                       | 0.03260600  | O                                                                            | 2.67486900  | -0.04464300 | -0.05621500 |
|   |                                                  |             | H                                                                            | 2.28840400  | 0.09965900  | 0.81818500  |
|   |                                                  |             | H                                                                            | 3.19844900  | 0.73318900  | -0.26069700 |
|   |                                                  |             | <b><i>cis</i>-H<sub>2</sub>SO<sub>4</sub>···(H<sub>2</sub>O)<sub>2</sub></b> |             |             |             |
|   | <b>(H<sub>2</sub>SO<sub>4</sub>)<sub>2</sub></b> |             | H                                                                            | -2.21657000 | 2.18361600  | 0.03481700  |
| S | -1.91516900                                      | -0.01102300 | O                                                                            | -1.66336700 | 1.40174800  | -0.01351100 |
| O | -1.56158400                                      | -1.19150800 | H                                                                            | -2.25396600 | 0.61329300  | -0.01717300 |
| O | -3.30777500                                      | -0.03591000 | H                                                                            | -3.34217500 | -1.45059500 | -0.57006900 |
| O | -0.99566100                                      | -0.05718400 | O                                                                            | -2.81262200 | -0.98754500 | 0.08107500  |
| O | -1.58895900                                      | 1.26459900  | H                                                                            | -1.93200000 | -1.39217700 | 0.06385700  |
| H | -0.59782100                                      | -1.36092400 | S                                                                            | 0.98122800  | -0.20239700 | -0.00334500 |
| H | -0.62690900                                      | 1.44143400  | O                                                                            | -0.04448400 | -1.20812100 | -0.01351200 |
| S | 1.74259400                                       | 0.02132600  | O                                                                            | 0.73610100  | 0.76507200  | -1.21514100 |
| O | 3.29058300                                       | 0.07407600  | O                                                                            | 2.34619900  | -0.56438000 | -0.00983500 |
| O | 1.64756800                                       | -0.02957800 | O                                                                            | 0.73943300  | 0.73457100  | 1.23370600  |
| O | 1.22816000                                       | 1.25649300  | H                                                                            | -0.18182400 | 1.09914700  | -1.15791400 |
| O | 1.24108700                                       | -1.20280200 | H                                                                            | -0.18319400 | 1.05431400  | 1.19774600  |
| H | 3.67198300                                       | -0.81176200 |                                                                              |             |             |             |
| H | 0.68659000                                       | -0.05908700 |                                                                              |             |             |             |
|   |                                                  |             | <b>(H<sub>2</sub>SO<sub>4</sub>)<sub>2</sub>···H<sub>2</sub>O</b>            |             |             |             |
| S | -2.01249900                                      | -0.34617900 |                                                                              |             |             |             |
| O | -1.39969600                                      | -1.09105000 |                                                                              |             |             |             |
| O | -3.24331700                                      | -0.96974300 |                                                                              |             |             |             |
| O | -0.98121500                                      | -0.27668300 |                                                                              |             |             |             |
| O | -2.25277900                                      | 1.08856900  |                                                                              |             |             |             |
| H | -0.47596900                                      | -0.79842200 |                                                                              |             |             |             |
| H | -1.45551100                                      | 1.70227800  |                                                                              |             |             |             |
| S | 1.93439900                                       | -0.13489700 |                                                                              |             |             |             |
| O | 3.37591900                                       | -0.70004700 |                                                                              |             |             |             |
| O | 1.37626500                                       | -1.12537400 |                                                                              |             |             |             |
| O | 2.09346200                                       | 1.17402900  |                                                                              |             |             |             |
| O | 1.19567600                                       | -0.26115000 |                                                                              |             |             |             |
| H | 3.35006600                                       | -1.53721100 |                                                                              |             |             |             |
| H | 0.38438100                                       | -0.90623700 |                                                                              |             |             |             |
| O | -0.29280900                                      | 2.63475400  |                                                                              |             |             |             |
| H | -0.06027800                                      | 3.22420500  |                                                                              |             |             |             |
| H | 0.53487700                                       | 2.22617600  |                                                                              |             |             |             |
|   |                                                  |             | <b>IM</b>                                                                    |             |             |             |
|   |                                                  |             | S                                                                            | -0.51069900 | -0.05265500 | 0.03102800  |
|   |                                                  |             | O                                                                            | -0.57652300 | -1.12475800 | -0.89652200 |
|   |                                                  |             | O                                                                            | -0.28746500 | -0.30989200 | 1.41861100  |
|   |                                                  |             | N                                                                            | -0.80105300 | 1.32091400  | -0.49000100 |
|   |                                                  |             | H                                                                            | -0.74728300 | 1.98936400  | 0.27500300  |
|   |                                                  |             | O                                                                            | 2.05517400  | 0.04392900  | -0.18461200 |
|   |                                                  |             | H                                                                            | 2.48181900  | 0.03544600  | 0.67502400  |
|   |                                                  |             | H                                                                            | 2.51453400  | 0.69704300  | -0.71627700 |

|                |             |             |             |                                      |             |             |             |
|----------------|-------------|-------------|-------------|--------------------------------------|-------------|-------------|-------------|
| <b>TS</b>      |             |             |             | <b>H<sub>2</sub>NSO<sub>3</sub>H</b> |             |             |             |
| S              | -0.29104700 | 0.04659800  | -0.06342200 | S                                    | -0.04656200 | 0.04510000  | -0.14196200 |
| O              | -0.98267900 | -1.12045500 | -0.46596700 | O                                    | -1.07645800 | -0.22804800 | 1.02994500  |
| O              | -0.79079600 | 0.87494800  | 0.98552500  | O                                    | -0.12329900 | -1.02590600 | -1.08266100 |
| N              | 0.64636300  | 0.70707200  | -1.14129100 | O                                    | -0.26977400 | 1.40317200  | -0.49916500 |
| H              | 0.59698700  | 1.71880200  | -1.06797100 | N                                    | 1.39634800  | -0.12922600 | 0.63201400  |
| O              | 1.32895400  | -0.65510300 | 0.59532900  | H                                    | -1.07825000 | -1.16989600 | 1.24451100  |
| H              | 1.52687200  | -0.27557500 | 1.46139100  | H                                    | 1.74263100  | 0.75183900  | 0.98921600  |
| H              | 1.56452000  | 0.06657600  | -0.30872500 | H                                    | 2.06241600  | -0.59271100 | 0.02862400  |
| <b>IM_WM1</b>  |             |             |             | <b>TS_WM1</b>                        |             |             |             |
| S              | -0.73400800 | -0.24372400 | 0.08662400  | S                                    | 0.65229500  | 0.12209100  | 0.10088200  |
| O              | -0.19133600 | -0.33565400 | 1.40243800  | O                                    | 0.51705800  | -0.31799800 | 1.45508800  |
| O              | -1.96937700 | 0.42839400  | -0.14014200 | O                                    | 1.87711600  | -0.05669000 | -0.60527100 |
| N              | -0.13188700 | -1.18272500 | -0.92219100 | N                                    | -0.19218200 | 1.37486500  | -0.20445600 |
| H              | -0.62008200 | -1.09679800 | -1.80968100 | H                                    | 0.11025200  | 1.78543200  | -1.08185100 |
| H              | 1.97134100  | -0.86842300 | -0.43134700 | H                                    | -1.64158500 | 0.85548500  | -0.04980800 |
| H              | 2.56832000  | -0.44130700 | 0.90500400  | H                                    | -2.67906400 | -0.04606000 | 0.84404600  |
| O              | 2.53429600  | -0.19469300 | -0.02330700 | O                                    | -2.36324900 | 0.08069400  | -0.05658900 |
| H              | 1.38962400  | 1.12134500  | -0.25170500 | H                                    | -1.52810400 | -0.71642900 | -0.35460500 |
| O              | 0.50282600  | 1.50885600  | -0.43293600 | O                                    | -0.42673000 | -1.13747400 | -0.69289400 |
| H              | 0.34687200  | 2.20863000  | 0.20866500  | H                                    | -0.18651300 | -2.00419700 | -0.34338100 |
| <b>IMF_WM1</b> |             |             |             | <b>IM_WD'</b>                        |             |             |             |
| S              | 0.65858400  | -0.06754000 | 0.07775300  | O                                    | 3.46909400  | -1.29459900 | 0.02015900  |
| O              | 0.47564300  | -0.13905500 | 1.49074600  | H                                    | 3.60537200  | -0.33535800 | -0.06918400 |
| O              | 1.94508200  | -0.21855100 | -0.51421600 | O                                    | 3.00325300  | 1.50868200  | -0.13507000 |
| N              | -0.03978800 | 1.38948100  | -0.37239600 | H                                    | 2.13478300  | 1.07843700  | 0.00403100  |
| H              | 0.24029700  | 2.08934300  | 0.30653800  | O                                    | 0.95389700  | -0.15831900 | 0.27747600  |
| H              | 0.28574900  | 1.65492800  | -1.29589700 | H                                    | 1.39121700  | -0.95886300 | -0.07155700 |
| H              | -3.46073300 | -0.12107500 | -0.38339900 | H                                    | 4.00973300  | -1.71003900 | -0.65931100 |
| O              | -2.62042500 | -0.09178300 | 0.07791200  | H                                    | 3.07213100  | 2.19491800  | 0.54516100  |
| H              | -2.26478600 | 0.79871900  | -0.03105500 | H                                    | 0.73306200  | -0.35469600 | 1.20127800  |
| O              | -0.28062800 | -1.06906600 | -0.66217000 | S                                    | -1.77359200 | -0.05339200 | -0.03690400 |
| H              | -1.21673700 | -0.92000400 | -0.37163800 | O                                    | -1.84100500 | -1.13363200 | -0.96104000 |
|                |             |             |             | O                                    | -2.10754100 | -0.21312400 | 1.34862000  |
|                |             |             |             | N                                    | -1.79255800 | 1.31605100  | -0.68292400 |
|                |             |             |             | H                                    | -1.84249400 | 2.05544600  | 0.01937000  |
| <b>TS_WD'</b>  |             |             |             | <b>IM_WD1</b>                        |             |             |             |
| O              | -3.28736600 | -1.06334400 | 0.09396400  | S                                    | -1.01465700 | -0.25121600 | 0.18056200  |
| H              | -3.24594000 | -0.08970200 | 0.08190600  | O                                    | -0.41942000 | 0.22862200  | 1.38790100  |
| O              | -2.37099300 | 1.58010400  | -0.01784000 | O                                    | -2.37950300 | 0.04243900  | -0.11487900 |
| H              | -1.52470600 | 1.13543400  | -0.20038500 | N                                    | -0.33311300 | -1.45850800 | -0.41374900 |
| O              | -0.45591000 | -0.92660100 | -0.53250800 | H                                    | -0.85833600 | -1.79728200 | -1.21423900 |
| H              | -1.32577400 | -1.19509700 | -0.15451100 | H                                    | 1.53636500  | -1.45746900 | -0.23924800 |
| H              | -3.86291700 | -1.30144000 | 0.82443200  | H                                    | 2.89826100  | -1.74734200 | 0.45115800  |

|                |             |             |             |                |             |             |             |
|----------------|-------------|-------------|-------------|----------------|-------------|-------------|-------------|
| H              | -2.39033500 | 2.35063200  | -0.59446300 | O              | 2.47214300  | -1.17909300 | -0.19232200 |
| H              | -0.24685600 | -1.54303600 | -1.24064600 | H              | 2.32569900  | 0.51647200  | 0.01674100  |
| S              | 1.46417000  | 0.02919700  | 0.10089300  | O              | 1.97806700  | 1.43288000  | 0.12239400  |
| O              | 1.54136700  | -0.75587700 | 1.28492600  | H              | 1.71363900  | 1.48022800  | 1.04702100  |
| O              | 2.13792400  | -0.35165400 | -1.09222400 | H              | 0.66436300  | 1.40116700  | -0.61790600 |
| N              | 1.07342200  | 1.47232800  | 0.33008600  | O              | -0.26264200 | 1.20617700  | -1.01688500 |
| H              | 1.13567200  | 2.00873400  | -0.53177200 | H              | -0.82285000 | 1.98503700  | -0.92593900 |
| <b>TS_WDI</b>  |             |             |             | <b>IMF_WDI</b> |             |             |             |
| S              | 0.95430500  | 0.19970500  | 0.15126100  | O              | -1.56774000 | -1.11912400 | -0.08889800 |
| O              | 0.36784200  | -0.27125800 | 1.37650900  | H              | -1.53496900 | -0.14236300 | -0.02909400 |
| O              | 2.34904900  | -0.00375300 | -0.09057700 | O              | -1.12948500 | 1.55923900  | 0.08600600  |
| N              | 0.27498900  | 1.45926200  | -0.36652700 | H              | -0.15142100 | 1.55581800  | 0.07585100  |
| H              | 0.79243500  | 1.83905300  | -1.15208700 | O              | 1.12885800  | -1.55873600 | -0.09717100 |
| H              | -1.43816800 | 1.39177400  | -0.22582800 | H              | 0.15079300  | -1.55435100 | -0.08090500 |
| H              | -2.79089200 | 1.57731900  | 0.56267000  | H              | -2.18941500 | -1.40841600 | 0.58006800  |
| O              | -2.38747700 | 1.08712400  | -0.15649600 | H              | -1.40596200 | 2.14707300  | -0.61819900 |
| H              | -2.20741400 | -0.40163000 | -0.01841300 | H              | 1.40878200  | -2.15120800 | 0.60177100  |
| O              | -1.86696400 | -1.37190300 | 0.03944300  | O              | 1.56629700  | 1.11824700  | 0.09910900  |
| H              | -1.61032300 | -1.48046300 | 0.96539000  | H              | 2.20371600  | 1.41434800  | -0.55177200 |
| H              | -0.80843800 | -1.32883500 | -0.52367300 | H              | 1.53504500  | 0.14209000  | 0.02991400  |
| O              | 0.28376900  | -1.08731800 | -0.97935400 |                |             |             |             |
| H              | 0.89924600  | -1.83046100 | -0.97875200 |                |             |             |             |
| <b>IM_AMI</b>  |             |             |             | <b>TS_AMI</b>  |             |             |             |
| S              | -0.74850500 | -0.22015500 | 0.09229600  | S              | 0.67053700  | 0.14950000  | 0.10149100  |
| O              | -0.11759000 | -0.36652100 | 1.36653500  | O              | 0.09928000  | 0.07120200  | 1.42057400  |
| O              | -1.96641700 | 0.51643300  | -0.01705700 | O              | 1.96203600  | -0.41940100 | -0.13485400 |
| N              | -0.31253900 | -1.21078900 | -0.95035300 | N              | 0.19934400  | 1.37006800  | -0.66651400 |
| H              | -0.86752600 | -1.08396800 | -1.79219300 | H              | 0.74200700  | 1.46367500  | -1.51909800 |
| H              | 1.38982900  | 0.98595400  | -0.31061300 | H              | -1.97844500 | 0.97579300  | -0.23021000 |
| O              | 0.48679900  | 1.40752100  | -0.50123600 | H              | -1.48765800 | -0.71651800 | -0.36353900 |
| H              | 0.34212100  | 2.12218000  | 0.12729300  | O              | -0.39235500 | -1.17850100 | -0.68880600 |
| N              | 2.55569100  | -0.15575000 | 0.01266500  | H              | -0.16215600 | -2.01427000 | -0.26637000 |
| H              | 3.51199800  | -0.09979700 | -0.31202500 | N              | -2.39988500 | 0.07333400  | 0.00768100  |
| H              | 2.11276300  | -0.96156000 | -0.42146700 | H              | -2.48121800 | 0.03096600  | 1.01817800  |
| H              | 2.56249500  | -0.33401900 | 1.01014500  | H              | -3.30901700 | -0.02186200 | -0.42630400 |
| <b>IMF_AMI</b> |             |             |             | <b>IM_MAI</b>  |             |             |             |
| S              | 0.63746200  | 0.03076000  | 0.14188100  | S              | 1.11635500  | -0.23673300 | -0.10219600 |
| O              | -0.07736000 | -0.52163000 | 1.24825600  | O              | 0.27258500  | -0.62209300 | -1.19210700 |
| O              | 2.00378400  | 0.42851100  | 0.26600100  | O              | 2.34472000  | 0.44296200  | -0.36376700 |
| N              | -0.24487300 | 1.23891600  | -0.44935100 | N              | 0.87794200  | -0.99694100 | 1.17409600  |
| H              | 0.14957400  | 1.65649000  | -1.28025900 | H              | 1.57848000  | -0.73452900 | 1.86160000  |
| H              | -1.24422100 | 0.99044500  | -0.49536700 | H              | -0.90458700 | 1.04592900  | 0.45752500  |
| H              | -3.07196900 | -0.80223900 | -0.67309400 | O              | 0.03487400  | 1.47570700  | 0.34049200  |
| O              | 0.59653700  | -1.05394300 | -1.04637100 | H              | 0.03841900  | 2.02454600  | -0.45099900 |



|                |             |             |             |                |             |             |             |
|----------------|-------------|-------------|-------------|----------------|-------------|-------------|-------------|
| O              | -0.46153200 | 1.50446500  | -0.50956600 | O              | -0.40074700 | 1.35996000  | -0.52768100 |
| H              | -0.78031000 | 2.21114600  | 0.06434600  | H              | -0.75513600 | 2.11926900  | -0.04621300 |
| C              | 2.63259000  | 0.05545000  | 0.10605400  | C              | 2.56475700  | 0.03871800  | 0.09037900  |
| H              | 3.68432200  | 0.08020100  | 0.40408400  | H              | 3.62307300  | 0.09270600  | 0.35578400  |
| O              | 2.19013500  | -1.15046400 | -0.04465000 | O              | 2.10327600  | -1.13739000 | -0.01147100 |
| O              | 2.00931000  | 1.09017400  | -0.05360000 | O              | 1.95682900  | 1.10620000  | -0.08079600 |
| H              | 1.21425400  | -1.18053100 | -0.31941400 | H              | 1.04805100  | -1.19916800 | -0.28386500 |
| <b>IMF_FA1</b> |             |             |             | <b>IM_SA'</b>  |             |             |             |
| S              | -1.22136100 | 0.08201000  | 0.11051000  | S              | 2.54741200  | 0.08068100  | 0.13751000  |
| O              | -0.27046200 | 1.04631800  | 0.59006300  | O              | 3.06130600  | -0.73806000 | -1.12198700 |
| O              | -2.59552500 | 0.19429000  | 0.46883500  | O              | 1.27266200  | 0.78560800  | -0.40561300 |
| N              | -0.65284900 | -1.36957700 | 0.48010900  | O              | 2.15743000  | -0.91268700 | 1.08560700  |
| H              | -1.22658500 | -2.13231100 | 0.14917500  | O              | 3.51149000  | 1.08376300  | 0.43143600  |
| H              | 1.45261200  | 1.12168500  | 0.28927400  | H              | 3.61594700  | -0.16094000 | -1.66624700 |
| O              | -1.15136400 | 0.10488700  | -1.48782100 | H              | 0.48656700  | 0.17916600  | -0.25965700 |
| H              | -1.84585900 | 0.68875000  | -1.82070500 | O              | -0.59962500 | -1.01058800 | 0.10293800  |
| C              | 2.83677400  | -0.11078900 | -0.09762600 | H              | 0.03341300  | -1.52405900 | 0.62377800  |
| H              | 3.91202900  | -0.13777200 | -0.30088600 | H              | -0.87709600 | -1.58628700 | -0.62721100 |
| O              | 2.15335000  | -1.10435100 | -0.07545900 | S              | -2.93291500 | 0.13539200  | -0.00451800 |
| O              | 2.41973900  | 1.11568700  | 0.10808300  | O              | -3.52768800 | -0.91660800 | -0.75539800 |
| H              | 0.35298400  | -1.45538700 | 0.31037200  | O              | -3.12732800 | 0.27224400  | 1.39933900  |
| <b>TS_SA'</b>  |             |             |             | <b>IM_SAI</b>  |             |             |             |
| S              | 2.47630100  | 0.02602100  | 0.13452400  | S              | 1.95879900  | 0.04474800  | -0.09470100 |
| O              | 3.00563200  | -0.50208600 | -1.26771700 | O              | 1.79434100  | 0.12769500  | 1.47360700  |
| O              | 1.39114400  | 1.08185800  | -0.28522100 | O              | 1.33439700  | -1.30379400 | -0.46443400 |
| O              | 1.81620500  | -1.10876800 | 0.72931200  | O              | 1.13177500  | 1.12030200  | -0.58362800 |
| O              | 3.55525100  | 0.70932900  | 0.78155400  | O              | 3.33983900  | 0.01949600  | -0.41640700 |
| H              | 3.77532500  | 0.05698800  | -1.53589800 | H              | 2.47141700  | -0.41401600 | 1.90025800  |
| H              | 0.51264900  | 0.60369100  | -0.35371400 | H              | 0.30456700  | -1.25442900 | -0.59831600 |
| O              | -0.93358400 | -1.18890400 | 0.07390300  | S              | -2.02277200 | -0.26623800 | 0.12683500  |
| H              | -0.14400200 | -1.50154000 | 0.56393300  | O              | -1.44057400 | -0.14407800 | 1.41753500  |
| H              | -1.19771900 | -1.90264100 | -0.52540200 | O              | -3.40983100 | -0.05884000 | -0.09744400 |
| S              | -2.78313700 | 0.17581600  | -0.00791100 | N              | -1.22087600 | -1.12048800 | -0.83575700 |
| O              | -3.50839200 | -0.67792100 | -0.88604100 | H              | -1.70945800 | -1.25630000 | -1.71442600 |
| O              | -2.98582000 | 0.15910700  | 1.40752900  | O              | -1.42423100 | 1.56195400  | -0.55189700 |
| N              | -2.14558600 | 1.38836800  | -0.66172500 | H              | -0.42971700 | 1.49191400  | -0.55965700 |
| H              | -1.74126000 | 2.01462500  | 0.03080700  | H              | -1.67282400 | 2.23820800  | 0.08962900  |
| <b>TS_SAI</b>  |             |             |             | <b>IMF_SAI</b> |             |             |             |
| S              | 1.93604300  | -0.00462200 | -0.10280600 | S              | 2.05232900  | -0.01135200 | 0.14249200  |
| O              | 1.82264500  | 0.48066600  | 1.40030700  | O              | 2.57767500  | 0.89082000  | -1.04666800 |
| O              | 1.25709500  | -1.34847000 | -0.12368500 | O              | 1.09637800  | 0.80892300  | 0.82057000  |
| O              | 1.12887900  | 0.97822200  | -0.81355400 | O              | 1.31831600  | -1.16459100 | -0.58616200 |

|               |             |             |             |               |             |             |             |
|---------------|-------------|-------------|-------------|---------------|-------------|-------------|-------------|
| O             | 3.30650200  | -0.11017400 | -0.45527600 | O             | 3.16796400  | -0.56931600 | 0.81914800  |
| H             | 2.45397100  | -0.00419600 | 1.94781800  | H             | 3.39233500  | 0.51087500  | -1.40129800 |
| H             | 0.13711000  | -1.31831800 | -0.32909300 | H             | -0.70431400 | 1.53524700  | 0.63940900  |
| S             | -2.01088900 | -0.19507700 | 0.14231700  | S             | -2.08535200 | -0.00170700 | -0.13337700 |
| O             | -1.54730500 | 0.05473300  | 1.46127600  | O             | -1.10840100 | -0.37220900 | -1.12732000 |
| O             | -3.37093100 | -0.04392100 | -0.23165900 | O             | -3.46873200 | -0.05781500 | -0.45905400 |
| N             | -1.17564100 | -1.23481600 | -0.60650800 | N             | -1.69365800 | 1.45462400  | 0.40892800  |
| H             | -1.58226300 | -1.49771500 | -1.49649100 | H             | -2.33369100 | 1.81098200  | 1.10542200  |
| O             | -1.31741100 | 1.39222700  | -0.69165900 | O             | -1.83653400 | -0.93401900 | 1.13554400  |
| H             | -0.28755100 | 1.26936000  | -0.72550500 | H             | 0.39147800  | -0.88833200 | -0.83404200 |
| H             | -1.53002600 | 2.16349600  | -0.14935200 | H             | -2.33516300 | -1.75652900 | 1.03369200  |
| <b>IM_SW'</b> |             |             |             | <b>TS_SW'</b> |             |             |             |
| H             | 0.49027800  | 2.93713900  | 0.48365900  | H             | -0.29491200 | 2.93572400  | -0.00267900 |
| O             | 0.76332100  | 2.06304300  | 0.20313700  | O             | -0.60659400 | 2.03736800  | 0.12899900  |
| H             | 0.01064400  | 1.65361700  | -0.28412400 | H             | 0.11587200  | 1.52996800  | 0.56364800  |
| H             | -1.27567200 | 0.53824400  | -2.03512500 | H             | 1.46549300  | -0.55047500 | 2.31305500  |
| O             | -0.98558000 | 0.44495100  | -1.12544900 | O             | 1.23708400  | -0.38870100 | 1.34843100  |
| H             | -0.36217500 | -0.29800700 | -1.10279400 | H             | 0.45696400  | -0.93231800 | 1.15849000  |
| S             | 2.60940400  | -0.43013200 | -0.01173800 | S             | -2.51127600 | -0.38397900 | -0.03980900 |
| O             | 1.40641700  | -0.87508600 | -0.66001500 | O             | -1.36951500 | -0.97187100 | 0.60729500  |
| O             | 3.09350600  | 0.88800200  | -0.71289800 | O             | -2.97005600 | 0.85701600  | 0.80360300  |
| O             | 3.72346300  | -1.29135000 | 0.10338000  | O             | -3.65969000 | -1.16022800 | -0.32325800 |
| O             | 2.23668200  | 0.06883900  | 1.43040400  | O             | -2.03258800 | 0.27439000  | -1.38330000 |
| H             | 2.35434500  | 1.53390000  | -0.69861000 | H             | -2.19375200 | 1.44235300  | 0.92440100  |
| H             | 1.51791700  | 0.72771300  | 1.34701800  | H             | -1.28782300 | 0.87412000  | -1.17883800 |
| S             | -3.10134300 | -0.26688100 | 0.14723300  | S             | 2.88669500  | -0.14871100 | -0.24643000 |
| O             | -3.93089000 | 0.03349500  | -0.96830500 | O             | 3.91815000  | -0.14857900 | 0.73424000  |
| O             | -2.70927700 | -1.60498000 | 0.44958000  | O             | 2.56764000  | -1.31081700 | -0.99888500 |
| N             | -3.02064500 | 0.81971700  | 1.19330800  | N             | 2.46773800  | 1.22165000  | -0.72356700 |
| H             | -2.50092600 | 0.50627000  | 2.01022600  | H             | 1.78184300  | 1.16349600  | -1.47030000 |
| <b>IM_SW1</b> |             |             |             | <b>TS_SW1</b> |             |             |             |
| S             | -2.02309600 | -0.30371100 | -0.06031200 | S             | -1.98616200 | -0.27915900 | -0.04450800 |
| O             | -1.38630000 | -1.10216300 | 1.12624900  | O             | -1.32633000 | -1.13064300 | 1.07976600  |
| O             | -2.15617100 | 1.12532000  | 0.45487200  | O             | -2.01017200 | 1.13660800  | 0.46467400  |
| O             | -1.04104900 | -0.28619100 | -1.14374300 | O             | -1.04835000 | -0.31372800 | -1.19689200 |
| O             | -3.29038600 | -0.87560400 | -0.30809600 | O             | -3.27766700 | -0.79621600 | -0.28102100 |
| H             | -0.48801900 | -0.76077700 | 1.32626700  | H             | -0.42462700 | -0.77737100 | 1.29562200  |
| H             | -1.34552600 | 1.73660200  | 0.19275900  | H             | -1.14574300 | 1.77663800  | 0.18716000  |
| S             | 2.13107500  | -0.09209900 | 0.18362100  | S             | 2.04912100  | -0.13993100 | 0.14910600  |
| O             | 1.15043700  | -0.15350500 | 1.23542500  | O             | 1.09703900  | -0.12589300 | 1.23969000  |
| O             | 3.32299300  | -0.86078800 | 0.29298600  | O             | 3.24219200  | -0.90560800 | 0.28602800  |
| N             | 2.08561100  | 1.20697000  | -0.57748800 | N             | 2.05123300  | 1.18625700  | -0.58213000 |
| H             | 2.84668000  | 1.27240700  | -1.24592400 | H             | 2.79716800  | 1.23971300  | -1.26672100 |
| H             | 0.58247400  | 2.13925100  | -0.36546700 | H             | 0.69281600  | 2.10084100  | -0.33989000 |



|                |             |             |             |               |             |             |             |
|----------------|-------------|-------------|-------------|---------------|-------------|-------------|-------------|
| H              | -0.04537700 | 3.24558100  | 0.54028100  | H             | 0.03710200  | 3.18234000  | 0.61381800  |
| O              | -0.25800300 | 2.60617300  | -0.14385500 | O             | -0.16177200 | 2.58375800  | -0.11150000 |
| H              | 0.25581600  | -0.95748300 | -1.14246800 | H             | 0.07605100  | -0.84737700 | -1.10869500 |
| O              | 1.23327900  | -1.27817800 | -1.07304500 | O             | 1.15576300  | -1.21494200 | -1.01064800 |
| H              | 1.26861200  | -2.19192900 | -0.76232000 | H             | 1.23564400  | -2.13983200 | -0.74072600 |
| <b>IMF_SW1</b> |             |             |             | <b>IM_SD'</b> |             |             |             |
| S              | -2.14577700 | -0.13563200 | -0.04130100 | S             | 2.48351700  | -1.48703500 | -0.02752200 |
| O              | -1.77594300 | -0.32226700 | 1.46477800  | O             | 2.95524300  | -2.40828700 | 1.14823800  |
| O              | -1.41415900 | 0.98622700  | -0.56462900 | O             | 3.04275000  | -2.29338400 | -1.22711000 |
| O              | -1.55622900 | -1.42294700 | -0.71823000 | O             | 1.04826700  | -1.50887200 | -0.03192600 |
| O              | -3.55348000 | -0.19882100 | -0.13460700 | O             | 3.15218800  | -0.20936800 | 0.08546300  |
| H              | -0.80304600 | -0.30544100 | 1.56431300  | H             | 3.84530800  | -2.14158700 | 1.43772100  |
| H              | -0.31796900 | 2.43660700  | -0.31498000 | H             | 2.67768900  | -1.88261600 | -2.06040800 |
| S              | 1.99036600  | -0.42266300 | 0.15164400  | S             | 0.68194900  | 2.40739400  | 0.05901900  |
| O              | 0.94437300  | -0.37251500 | 1.12781500  | O             | 1.90324200  | 1.85637700  | -0.75338900 |
| O              | 3.10525500  | -1.30113400 | 0.26672100  | O             | -0.52478000 | 2.13637200  | -0.89267300 |
| N              | 2.49850600  | 1.06387100  | -0.08583700 | O             | 0.54926200  | 1.55512700  | 1.33909300  |
| H              | 3.29949300  | 1.15475900  | -0.69233400 | O             | 0.84288800  | 3.81039400  | 0.24146000  |
| H              | 1.77836600  | 1.80646700  | -0.11247100 | H             | 2.34732400  | 1.09482000  | -0.26010000 |
| H              | 0.29170100  | 3.57362100  | 0.53288000  | H             | -0.97540100 | 1.28615000  | -0.64978700 |
| O              | 0.48426300  | 2.96435700  | -0.18193300 | S             | -3.64068800 | -0.82551500 | -0.02014300 |
| H              | -0.62518800 | -1.26511000 | -0.96021100 | O             | -3.29357200 | -2.07573500 | -0.65940400 |
| O              | 1.21369600  | -0.88760500 | -1.19547400 | O             | -4.25863800 | -0.85647500 | 1.26713500  |
| H              | 1.79147200  | -1.47763100 | -1.69736300 | N             | -3.96218900 | 0.24632700  | -1.03374400 |
| <b>TS_SD'</b>  |             |             |             | <b>IM_SD1</b> |             |             |             |
| S              | 2.36537300  | -1.60510500 | -0.02566200 | S             | -2.40800500 | -0.81905400 | 0.05428600  |
| O              | 2.86732100  | -2.45539800 | 1.18601800  | O             | -3.75256300 | -1.59727900 | 0.16329000  |
| O              | 2.95216500  | -2.43351500 | -1.19794000 | O             | -2.66289200 | -0.01854700 | -1.24736200 |
| O              | 0.93227500  | -1.67956100 | -0.02514000 | O             | -2.35986800 | 0.06154700  | 1.18129500  |
| O              | 2.98505700  | -0.30028900 | 0.02698400  | O             | -1.33415000 | -1.74900200 | -0.13670700 |
| H              | 3.76040900  | -2.17388500 | 1.44509800  | H             | -3.72995500 | -2.39397300 | -0.38621000 |
| H              | 2.60429200  | -2.03610400 | -2.04251000 | H             | -1.86442700 | 0.55085100  | -1.39930200 |
| S              | 0.71638800  | 2.50475200  | 0.05147000  | S             | 2.33905500  | -1.19681200 | 0.07178300  |
| O              | 1.96551600  | 1.93766800  | -0.70798500 | O             | 1.31002700  | -1.74831800 | -0.96376700 |
| O              | -0.46115100 | 2.19450200  | -0.91349500 | O             | 3.00430100  | -0.03295300 | -0.66630000 |
| O              | 0.56829800  | 1.67829000  | 1.34917100  | O             | 1.56643200  | -0.67914600 | 1.19884500  |
| O              | 0.87583300  | 3.90454800  | 0.19382600  | O             | 3.30698400  | -2.19020300 | 0.33962100  |

|               |             |             |             |                |             |             |             |
|---------------|-------------|-------------|-------------|----------------|-------------|-------------|-------------|
| H             | 2.33581600  | 1.13799000  | -0.24561000 | H              | 0.38948500  | -1.66135300 | -0.64538900 |
| H             | -0.91436600 | 1.34927100  | -0.64927900 | H              | 2.50458400  | 0.86222900  | -0.56284500 |
| S             | -3.56402500 | -0.83064100 | -0.01214600 | S              | 0.22761100  | 2.11606300  | -0.18059200 |
| O             | -3.25407800 | -2.11395200 | -0.61181000 | O              | -0.28328500 | 1.05589700  | -1.02347600 |
| O             | -4.14544800 | -0.79290100 | 1.29089500  | O              | -0.57459800 | 3.26295000  | 0.06015400  |
| N             | -3.88713400 | 0.20256600  | -1.06482300 | N              | 1.73352200  | 2.21650600  | -0.29555400 |
| H             | -4.43642400 | 0.97288600  | -0.69606100 | H              | 2.09854600  | 3.03737400  | 0.17526100  |
| O             | -1.16798700 | -0.07628600 | 0.42010800  | O              | 0.04486100  | 1.27220000  | 1.44768200  |
| H             | -0.82261000 | -0.99097000 | 0.25604700  | H              | -0.87629700 | 0.93211000  | 1.53574500  |
| H             | -0.54334400 | 0.31388900  | 1.08243600  | H              | 0.68285500  | 0.45690300  | 1.39777300  |
| <b>TS_SD1</b> |             |             |             | <b>IMF_SD1</b> |             |             |             |
| S             | -2.41449600 | -0.78359200 | 0.05585100  | S              | -1.63734200 | 1.55384900  | 0.02470800  |
| O             | -3.77412000 | -1.53285000 | 0.17412000  | O              | -2.32045500 | 2.94507900  | 0.24964000  |
| O             | -2.64823100 | 0.00626100  | -1.25370400 | O              | -0.83689300 | 1.76134600  | -1.25726700 |
| O             | -2.34733000 | 0.10892800  | 1.17365300  | O              | -0.75646900 | 1.36788400  | 1.14277100  |
| O             | -1.35889000 | -1.73800900 | -0.11904800 | O              | -2.69020600 | 0.60313500  | -0.19515300 |
| H             | -3.76868500 | -2.33658400 | -0.36557800 | H              | -3.18976000 | 2.96094800  | -0.17398500 |
| H             | -1.84069100 | 0.56938700  | -1.40056800 | H              | 0.16021700  | 1.60402500  | -1.11379200 |
| S             | 2.31776000  | -1.19849600 | 0.05418800  | S              | -0.70608200 | -2.19904800 | -0.08004900 |
| O             | 1.27523900  | -1.78544500 | -0.94697800 | O              | -2.24586500 | -2.06693200 | -0.01378800 |
| O             | 2.93153500  | -0.03341300 | -0.68111500 | O              | -0.16037100 | -1.08336900 | -0.81564800 |
| O             | 1.54008600  | -0.70135500 | 1.20948500  | O              | -0.31330300 | -1.98859100 | 1.43053500  |
| O             | 3.28607300  | -2.18378600 | 0.34945900  | O              | -0.39101000 | -3.52237800 | -0.47058700 |
| H             | 0.35646200  | -1.70242200 | -0.62174000 | H              | -2.50335500 | -1.11560100 | -0.04522500 |
| H             | 2.42911000  | 0.93513200  | -0.54876800 | H              | 1.86326200  | -1.20678400 | -1.17581000 |
| S             | 0.25322900  | 2.08128700  | -0.15092800 | S              | 2.47382600  | 0.59573100  | -0.01883000 |
| O             | -0.28306400 | 1.07854100  | -1.04839300 | O              | 1.64213800  | 1.47283500  | -0.81585800 |
| O             | -0.48810800 | 3.26482700  | 0.10345000  | O              | 3.72911200  | 1.05252600  | 0.45358300  |
| N             | 1.76956600  | 2.15752600  | -0.30888400 | N              | 2.71435200  | -0.75116700 | -0.86208100 |
| H             | 2.17409100  | 2.94775400  | 0.17953700  | H              | 3.44184600  | -1.34517000 | -0.49114000 |
| O             | 0.09564900  | 1.22203700  | 1.38455200  | O              | 1.58583400  | 0.18717200  | 1.23001600  |
| H             | -0.83674600 | 0.91479600  | 1.49618300  | H              | 0.74577800  | 0.71606900  | 1.22941900  |
| H             | 0.76489200  | 0.33617300  | 1.31348900  | H              | 0.45502200  | -1.39347800 | 1.48589300  |
